# Supplementary material for: A novel pyroptosis-related signature predicts prognosis and response to treatment in breast carcinoma
Source: Aging (Albany NY). 2022 Jan 27;14(2):989–1013. doi: 10.18632/aging.203855 (PMC8833126; doi:10.18632/aging.203855)
Supplement: Supplementary Table 3 [file aging-14-203855-s003.xls]

## Sheet: Table S3
Supplementary Table 3. Results of univariate and multivariate Cox regression analysis in the TCGA database.
ID	Age	Menopausal_State	His_Subtype	Histologic_Grade	Tumor_Stage	ER_Status	PR_Status	HER2_Status	OS.time	OS	riskScore-PRS	risk-PRS
TCGA-3C-AALI	<60	Post	Ductal/NST	NA	I+II	Positive	Positive	Positive	133.5	0	-0.427453	low
TCGA-3C-AALJ	>60	Post	Ductal/NST	NA	I+II	Positive	Positive	NA	49.1333	0	-0.102857	low
TCGA-3C-AALK	<60	Pre	Ductal/NST	NA	I+II	Positive	Positive	Positive	48.2667	0	-0.194874	low
TCGA-4H-AAAK	<60	Post	Other	NA	III+IV	Positive	Positive	Negative	11.6	0	0.146058	low
TCGA-5L-AAT0	<60	Post	Other	NA	I+II	Positive	Positive	Negative	49.2333	0	-0.0238118	low
TCGA-5L-AAT1	>60	Post	Other	NA	III+IV	Positive	Positive	Negative	49.0333	0	-0.284188	low
TCGA-5T-A9QA	<60	Pre	Other	NA	I+II	Positive	Negative	Negative	10.1	0	-0.221139	low
TCGA-A1-A0SD	<60	Pre	Ductal/NST	NA	I+II	Positive	Positive	Negative	14.5667	0	-0.0465547	low
TCGA-A1-A0SE	<60	Pre	Other	NA	I+II	Positive	Positive	Negative	44.0333	0	-0.00701652	low
TCGA-A1-A0SF	<60	Pre	Ductal/NST	NA	I+II	Positive	Positive	Negative	48.7667	0	-0.332593	low
TCGA-A1-A0SG	>60	Post	Other	NA	I+II	Positive	Positive	Negative	14.4667	0	-0.0394677	low
TCGA-A1-A0SH	<60	Pre	Ductal/NST	NA	I+II	Negative	Positive	Negative	47.9	0	0.0237516	low
TCGA-A1-A0SI	<60	Pre	Ductal/NST	NA	I+II	Positive	Positive	Negative	21.1667	0	-0.257338	low
TCGA-A1-A0SJ	<60	Pre	Ductal/NST	NA	III+IV	Positive	Positive	Negative	13.8667	0	-0.0896903	low
TCGA-A1-A0SK	<60	Pre	Other	NA	I+II	Negative	Negative	Negative	32.2333	1	1.05028	high
TCGA-A1-A0SM	>60	Pre	Ductal/NST	NA	NA	Positive	Negative	Positive	8.06667	0	0.179764	high
TCGA-A1-A0SN	<60	Post	Ductal/NST	NA	I+II	Positive	Positive	Positive	39.8667	0	0.0363047	low
TCGA-A1-A0SO	>60	Post	Ductal/NST	NA	I+II	Negative	Negative	NA	28.4	0	0.253755	high
TCGA-A1-A0SP	<60	Pre	Ductal/NST	NA	I+II	Negative	Negative	Negative	19.4667	0	-0.0906883	low
TCGA-A1-A0SQ	<60	Pre	Ductal/NST	NA	I+II	Positive	Positive	Negative	18.4667	0	0.318088	high
TCGA-A2-A04N	>60	Post	Ductal/NST	NA	I+II	Positive	Positive	NA	145.133	0	0.0232432	low
TCGA-A2-A04P	<60	Pre	Ductal/NST	NA	III+IV	Negative	Negative	NA	18.2667	1	-0.282288	low
TCGA-A2-A04Q	<60	Post	Ductal/NST	NA	I+II	Negative	Negative	Negative	79.5	0	-0.414995	low
TCGA-A2-A04R	<60	Pre	Ductal/NST	NA	I+II	Positive	Positive	Negative	123.633	0	-0.159139	low
TCGA-A2-A04T	>60	Post	Ductal/NST	NA	I+II	Negative	Negative	Negative	74.8667	0	0.208792	high
TCGA-A2-A04U	<60	Pre	Ductal/NST	NA	I+II	Negative	Negative	Negative	88.4667	0	-0.325018	low
TCGA-A2-A04V	<60	Pre	Ductal/NST	NA	I+II	Positive	Positive	Negative	64	1	-0.276156	low
TCGA-A2-A04W	<60	Pre	Other	NA	I+II	Negative	Negative	Positive	103.4	0	0.28208	high
TCGA-A2-A04X	<60	Pre	Ductal/NST	NA	I+II	Positive	Positive	Positive	56.2	0	-0.7642	low
TCGA-A2-A04Y	<60	Post	Ductal/NST	NA	I+II	Positive	Positive	Negative	36.6333	0	-0.284614	low
TCGA-A2-A0CK	<60	Post	Other	NA	III+IV	Positive	Positive	Negative	138.633	0	-0.0635694	low
TCGA-A2-A0CM	<60	Pre	Ductal/NST	NA	I+II	Negative	Negative	Negative	25.1333	1	0.139824	low
TCGA-A2-A0CO	>60	Post	Other	NA	I+II	Positive	Positive	Negative	116.4	1	-0.455687	low
TCGA-A2-A0CP	<60	Post	Ductal/NST	NA	I+II	Positive	Positive	NA	93.7667	0	-0.222927	low
TCGA-A2-A0CQ	>60	Post	Ductal/NST	NA	I+II	Positive	Positive	Negative	89.8333	0	0.00178256	low
TCGA-A2-A0CR	<60	Post	Other	NA	I+II	Positive	Positive	Negative	109.433	0	-0.701532	low
TCGA-A2-A0CS	>60	Post	Ductal/NST	NA	III+IV	Positive	Positive	Negative	78.2667	1	0.470124	high
TCGA-A2-A0CT	>60	Post	Ductal/NST	NA	I+II	Positive	Negative	Negative	76.3	0	0.244654	high
TCGA-A2-A0CU	>60	Post	Ductal/NST	NA	I+II	Positive	Positive	Negative	5.26667	1	0.125604	low
TCGA-A2-A0CV	<60	Post	Ductal/NST	NA	I+II	Positive	Positive	Negative	100.367	0	-0.309981	low
TCGA-A2-A0CW	>60	Post	Ductal/NST	NA	I+II	Positive	Positive	Negative	109.433	0	-0.128498	low
TCGA-A2-A0CX	<60	Pre	Ductal/NST	NA	I+II	Positive	Negative	Positive	57.6	0	-0.162133	low
TCGA-A2-A0CY	>60	Post	Ductal/NST	NA	I+II	Positive	Positive	Negative	55.7667	0	-0.19567	low
TCGA-A2-A0D0	<60	Post	Ductal/NST	NA	I+II	Negative	Negative	Negative	68.2667	0	-0.271695	low
TCGA-A2-A0D1	>60	Post	Ductal/NST	NA	I+II	Negative	Negative	Positive	35.0333	0	-0.193128	low
TCGA-A2-A0D2	<60	Pre	Ductal/NST	NA	I+II	Negative	Negative	Negative	34.2333	0	0.173398	high
TCGA-A2-A0D3	<60	Post	Ductal/NST	NA	I+II	Positive	Positive	Negative	62.4333	0	-0.331182	low
TCGA-A2-A0D4	<60	Pre	Ductal/NST	NA	I+II	Positive	Positive	Negative	25.5667	0	0.195018	high
TCGA-A2-A0EM	>60	Post	Ductal/NST	NA	I+II	Positive	Positive	NA	103.133	0	0.23976	high
TCGA-A2-A0EN	>60	Post	Other	NA	I+II	Positive	Positive	Negative	136.267	0	-0.0697196	low
TCGA-A2-A0EO	<60	Pre	Ductal/NST	NA	I+II	Positive	Positive	Negative	81.4	0	-0.0028821	low
TCGA-A2-A0EP	<60	Post	Other	NA	I+II	Positive	Negative	Negative	120.1	0	-0.431517	low
TCGA-A2-A0EQ	>60	Post	Ductal/NST	NA	I+II	Negative	Negative	Positive	80.8667	0	-0.437723	low
TCGA-A2-A0ER	>60	Post	Ductal/NST	NA	I+II	Positive	Positive	Negative	75.4333	0	-0.0198213	low
TCGA-A2-A0ES	<60	Post	Other	NA	I+II	Positive	Positive	Negative	73	0	-0.167676	low
TCGA-A2-A0ET	<60	Post	Ductal/NST	NA	III+IV	Positive	Positive	Negative	35.5333	0	0.05867	low
TCGA-A2-A0EU	>60	Post	Ductal/NST	NA	I+II	Positive	Positive	Negative	34.7667	0	-0.189172	low
TCGA-A2-A0EV	>60	Post	Ductal/NST	NA	I+II	Positive	Positive	Negative	32.2667	0	0.271671	high
TCGA-A2-A0EW	<60	Post	Other	NA	III+IV	Positive	Positive	Negative	62.8	1	-0.115221	low
TCGA-A2-A0EX	<60	Post	Other	NA	I+II	Positive	Positive	Negative	25.0667	0	0.224862	high
TCGA-A2-A0EY	>60	Post	Ductal/NST	NA	I+II	Positive	Negative	Positive	64.1667	0	0.281207	high
TCGA-A2-A0ST	>60	Post	Ductal/NST	NA	I+II	Negative	Negative	NA	100.567	0	-0.580601	low
TCGA-A2-A0SU	>60	Post	Ductal/NST	NA	I+II	Positive	Positive	Negative	55.4	0	-0.33294	low
TCGA-A2-A0SV	>60	Post	Ductal/NST	NA	III+IV	Positive	Positive	Negative	27.5	1	0.371233	high
TCGA-A2-A0SW	>60	Post	Ductal/NST	NA	III+IV	Positive	Negative	NA	45.5	1	-0.488837	low
TCGA-A2-A0SX	<60	Pre	Ductal/NST	NA	I+II	Negative	Negative	Negative	51.1333	0	0.021742	low
TCGA-A2-A0SY	>60	Post	Other	NA	III+IV	Positive	Positive	NA	44.9	0	-0.10978	low
TCGA-A2-A0T0	<60	Post	Ductal/NST	NA	I+II	Negative	Negative	Negative	17.7667	0	0.765114	high
TCGA-A2-A0T1	<60	Post	Ductal/NST	NA	III+IV	Negative	Negative	Positive	17.3667	0	0.142085	low
TCGA-A2-A0T2	>60	Post	Ductal/NST	NA	III+IV	Negative	Negative	Negative	8.5	1	0.35198	high
TCGA-A2-A0T3	<60	Pre	Ductal/NST	NA	I+II	Positive	Positive	Negative	50.5333	0	-0.00654837	low
TCGA-A2-A0T4	>60	Post	Other	NA	I+II	Positive	Positive	Negative	20.8	0	-0.0914297	low
TCGA-A2-A0T5	<60	Pre	Ductal/NST	NA	I+II	Positive	Positive	Negative	17.7	0	0.0202451	low
TCGA-A2-A0T6	<60	Pre	Other	NA	I+II	Positive	Positive	Negative	19.1667	0	0.191048	high
TCGA-A2-A0T7	<60	Pre	Ductal/NST	NA	I+II	Positive	Positive	Negative	21.0333	0	0.51464	high
TCGA-A2-A0YC	<60	Post	Ductal/NST	NA	I+II	Positive	Positive	NA	33	0	-0.0579714	low
TCGA-A2-A0YD	>60	Post	Other	NA	I+II	Positive	Positive	NA	25.6333	0	-0.138259	low
TCGA-A2-A0YE	<60	Post	Ductal/NST	NA	I+II	Negative	Negative	Negative	18.4667	0	-0.436529	low
TCGA-A2-A0YF	>60	Post	Ductal/NST	NA	I+II	Positive	Negative	Negative	51.1667	0	0.272763	high
TCGA-A2-A0YG	>60	Post	Ductal/NST	NA	III+IV	Positive	Positive	Positive	22.2	0	0.528014	high
TCGA-A2-A0YH	<60	Post	Ductal/NST	NA	III+IV	Positive	Positive	Negative	21.9667	0	0.10418	low
TCGA-A2-A0YI	>60	Post	Ductal/NST	NA	I+II	Positive	Positive	Negative	50.1667	0	-0.0506057	low
TCGA-A2-A0YJ	<60	Pre	Ductal/NST	NA	III+IV	Positive	Negative	Negative	18.8667	0	0.444708	high
TCGA-A2-A0YL	<60	Pre	Other	NA	III+IV	Positive	Positive	Negative	49.1333	0	-0.309714	low
TCGA-A2-A0YM	>60	Post	Ductal/NST	NA	I+II	Negative	Negative	NA	32.1667	0	0.221648	high
TCGA-A2-A0YT	<60	Post	Ductal/NST	NA	III+IV	Positive	Negative	NA	24.1	1	0.424767	high
TCGA-A2-A1FV	>60	Post	Other	NA	I+II	Positive	Positive	Negative	23.8	0	0.208007	high
TCGA-A2-A1FW	>60	Post	Ductal/NST	NA	III+IV	Positive	Negative	Negative	17.6	0	0.0937961	low
TCGA-A2-A1FX	>60	Post	Ductal/NST	NA	III+IV	Positive	Positive	NA	61.5667	0	-0.030247	low
TCGA-A2-A1FZ	>60	Post	Ductal/NST	NA	I+II	Positive	Positive	Negative	22.7667	0	1.04716	high
TCGA-A2-A1G0	<60	Pre	Other	NA	I+II	Positive	Positive	Negative	20.5333	0	-0.462653	low
TCGA-A2-A1G1	>60	Post	Ductal/NST	NA	I+II	Negative	Negative	Negative	19.4667	0	0.0546974	low
TCGA-A2-A1G4	>60	Post	Ductal/NST	NA	III+IV	Positive	Positive	Negative	19.8333	0	0.255623	high
TCGA-A2-A259	>60	Post	Ductal/NST	NA	I+II	Positive	Positive	Negative	53.2	0	-0.139642	low
TCGA-A2-A25B	<60	Pre	Ductal/NST	NA	I+II	Positive	Positive	Negative	43.0333	0	0.0792736	low
TCGA-A2-A25C	<60	Pre	Ductal/NST	NA	I+II	Positive	Positive	Negative	17.4333	0	0.135036	low
TCGA-A2-A25D	>60	Post	Other	NA	III+IV	Positive	Negative	Negative	18.4	0	-0.632509	low
TCGA-A2-A25E	<60	Pre	Ductal/NST	NA	III+IV	Positive	Positive	Negative	106.8	0	0.0329072	low
TCGA-A2-A25F	>60	Post	Ductal/NST	NA	I+II	Negative	Positive	Negative	10.7333	0	0.0327285	low
TCGA-A2-A3KC	<60	Pre	Other	NA	I+II	Positive	Positive	Negative	36.7333	0	0.201425	high
TCGA-A2-A3KD	<60	Pre	Other	NA	III+IV	Positive	Positive	Negative	40.2	0	0.333587	high
TCGA-A2-A3XS	>60	Post	Ductal/NST	NA	III+IV	Negative	Negative	NA	34.4	1	0.174553	high
TCGA-A2-A3XT	<60	Pre	Ductal/NST	NA	I+II	Negative	Negative	Negative	92.3333	0	0.0856477	low
TCGA-A2-A3XU	<60	Post	Ductal/NST	NA	I+II	Negative	Negative	NA	30.4	1	0.76446	high
TCGA-A2-A3XV	<60	Pre	Ductal/NST	NA	I+II	Positive	Negative	Negative	33.2	0	-0.243836	low
TCGA-A2-A3XX	<60	Post	Ductal/NST	NA	I+II	Negative	Negative	Negative	47.9667	1	0.188834	high
TCGA-A2-A3XY	<60	Post	Ductal/NST	NA	I+II	Negative	Negative	Negative	36.4333	1	0.053606	low
TCGA-A2-A3XZ	<60	Pre	Ductal/NST	NA	I+II	Negative	Negative	Positive	51.0667	0	-0.439746	low
TCGA-A2-A3Y0	<60	Post	Ductal/NST	NA	I+II	Positive	Negative	Negative	51.5333	0	-0.0150576	low
TCGA-A2-A4RW	<60	Pre	Other	NA	III+IV	Positive	Positive	Negative	7.4	0	-0.0772023	low
TCGA-A2-A4RX	>60	Post	Other	NA	I+II	Positive	Positive	Negative	24.7333	0	0.291476	high
TCGA-A2-A4S0	>60	Post	Other	NA	I+II	Positive	Positive	Negative	23.5333	0	0.00561262	low
TCGA-A2-A4S1	>60	Post	Other	NA	I+II	Positive	Negative	Negative	27.3333	0	0.25028	high
TCGA-A2-A4S2	>60	Post	Other	NA	III+IV	Positive	Positive	Negative	21.4333	0	-0.296263	low
TCGA-A2-A4S3	<60	Post	Ductal/NST	NA	I+II	Positive	Positive	Negative	22.2	0	-0.550999	low
TCGA-A7-A0CD	>60	Pre	Ductal/NST	NA	I+II	Positive	Positive	Negative	38.8333	0	0.194193	high
TCGA-A7-A0CE	<60	Pre	Ductal/NST	NA	I+II	Negative	Negative	Negative	35.8	0	-0.0482244	low
TCGA-A7-A0CG	>60	Post	Other	NA	I+II	Positive	Negative	Negative	34.7667	0	-0.133014	low
TCGA-A7-A0CH	>60	Post	Ductal/NST	NA	I+II	NA	NA	NA	35.9667	0	0.0635153	low
TCGA-A7-A0CJ	<60	Post	Ductal/NST	NA	I+II	Positive	Positive	Negative	31.0333	0	0.116835	low
TCGA-A7-A0D9	<60	Pre	Ductal/NST	NA	I+II	Positive	Negative	Negative	37.9667	0	0.352352	high
TCGA-A7-A0DA	>60	Post	Ductal/NST	NA	I+II	Negative	Negative	Negative	36.1667	0	0.678515	high
TCGA-A7-A0DB	<60	Post	Ductal/NST	NA	I+II	Positive	Positive	Negative	33.5667	0	0.0581958	low
TCGA-A7-A0DB	<60	Post	Ductal/NST	NA	I+II	Positive	Positive	Negative	33.5667	0	0.0581958	low
TCGA-A7-A0DB	<60	Post	Ductal/NST	NA	I+II	Positive	Positive	Negative	33.5667	0	0.0581958	low
TCGA-A7-A0DC	>60	Post	Ductal/NST	NA	I+II	Positive	Negative	Negative	30.2	0	-0.256966	low
TCGA-A7-A0DC	>60	Post	Ductal/NST	NA	I+II	Positive	Negative	Negative	30.2	0	-0.256966	low
TCGA-A7-A13D	<60	Post	Ductal/NST	NA	I+II	Negative	Positive	Negative	32.1667	0	0.651819	high
TCGA-A7-A13D	<60	Post	Ductal/NST	NA	I+II	Negative	Positive	Negative	32.1667	0	0.651819	high
TCGA-A7-A13D	<60	Post	Ductal/NST	NA	I+II	Negative	Positive	Negative	32.1667	0	0.651819	high
TCGA-A7-A13E	>60	Post	Ductal/NST	NA	I+II	Positive	Negative	Negative	20.4667	1	-0.0640648	low
TCGA-A7-A13E	>60	Post	Ductal/NST	NA	I+II	Positive	Negative	Negative	20.4667	1	-0.0640648	low
TCGA-A7-A13E	>60	Post	Ductal/NST	NA	I+II	Positive	Negative	Negative	20.4667	1	-0.0640648	low
TCGA-A7-A13F	<60	Pre	Ductal/NST	NA	III+IV	Positive	Positive	Negative	25.5	0	0.456534	high
TCGA-A7-A13G	>60	Post	Ductal/NST	NA	I+II	Positive	Positive	Negative	23.9333	0	-0.232007	low
TCGA-A7-A13H	>60	Post	Other	NA	I+II	Positive	Positive	Negative	29.9667	0	-0.0840023	low
TCGA-A7-A26E	>60	Post	Other	NA	III+IV	Positive	Positive	Negative	31.8	0	-0.422955	low
TCGA-A7-A26E	>60	Post	Other	NA	III+IV	Positive	Positive	Negative	31.8	0	-0.422955	low
TCGA-A7-A26E	>60	Post	Other	NA	III+IV	Positive	Positive	Negative	31.8	0	-0.422955	low
TCGA-A7-A26F	<60	Post	Other	NA	I+II	Negative	Negative	Negative	24.6	0	0.062483	low
TCGA-A7-A26G	<60	Pre	Other	NA	I+II	Negative	Negative	Negative	24.0667	0	0.539536	high
TCGA-A7-A26H	>60	Post	Ductal/NST	NA	I+II	Positive	Negative	Negative	24.1333	0	0.147031	low
TCGA-A7-A26I	>60	Post	Ductal/NST	NA	I+II	Negative	Negative	Negative	22.0333	0	-0.0579567	low
TCGA-A7-A26J	<60	Pre	Ductal/NST	NA	I+II	Positive	Positive	Negative	20.9	0	-0.295278	low
TCGA-A7-A26J	<60	Pre	Ductal/NST	NA	I+II	Positive	Positive	Negative	20.9	0	-0.295278	low
TCGA-A7-A26J	<60	Pre	Ductal/NST	NA	I+II	Positive	Positive	Negative	20.9	0	-0.295278	low
TCGA-A7-A2KD	<60	Post	Ductal/NST	NA	III+IV	Positive	Positive	Positive	22.6333	0	-0.185502	low
TCGA-A7-A3IY	>60	Post	Other	NA	I+II	Positive	Positive	Negative	11.5	0	-0.160268	low
TCGA-A7-A3IZ	>60	Post	Other	NA	I+II	Positive	Negative	Negative	10.7333	0	0.17947	high
TCGA-A7-A3J0	>60	Post	Other	NA	I+II	Positive	Positive	Negative	10.4333	0	0.19401	high
TCGA-A7-A3J1	>60	Post	Other	NA	I+II	Positive	Positive	Negative	11.4333	0	-0.137431	low
TCGA-A7-A3RF	>60	Post	Other	NA	I+II	Positive	Positive	Negative	13.6	0	0.293621	high
TCGA-A7-A425	>60	Post	Other	NA	III+IV	Positive	Positive	Positive	14.9	0	0.314188	high
TCGA-A7-A426	<60	Pre	Other	NA	III+IV	Positive	Positive	Negative	12.1333	0	-0.0152086	low
TCGA-A7-A4SA	<60	Pre	Other	NA	I+II	Positive	Negative	Negative	15.1333	0	-0.382475	low
TCGA-A7-A4SB	<60	Post	Other	NA	III+IV	Positive	Positive	Negative	13.9333	0	0.0608487	low
TCGA-A7-A4SC	>60	Post	Other	NA	I+II	Positive	Negative	Positive	14.8667	0	-0.0767558	low
TCGA-A7-A4SD	<60	Post	Ductal/NST	NA	I+II	Negative	Negative	Negative	14.7	0	-0.332012	low
TCGA-A7-A4SE	<60	Post	Ductal/NST	NA	I+II	Negative	Negative	Negative	21.4667	0	0.266835	high
TCGA-A7-A4SF	<60	Post	Ductal/NST	NA	I+II	Positive	Negative	Positive	18.1667	0	-0.155941	low
TCGA-A7-A56D	>60	Post	Ductal/NST	NA	I+II	Positive	Positive	Negative	14.9333	0	-0.53669	low
TCGA-A7-A5ZV	>60	Post	Other	NA	I+II	Negative	Negative	Negative	12.2667	0	0.55835	high
TCGA-A7-A5ZW	<60	Pre	Ductal/NST	NA	I+II	Positive	Positive	Negative	10.8667	0	-0.0742522	low
TCGA-A7-A5ZX	<60	Pre	Other	NA	III+IV	Positive	Positive	Negative	11.2	0	-0.169737	low
TCGA-A7-A6VV	<60	Pre	Ductal/NST	NA	I+II	Negative	Negative	Negative	10.4333	0	0.531841	high
TCGA-A7-A6VW	<60	Post	Ductal/NST	NA	I+II	Negative	Negative	Negative	9.5	0	0.237933	high
TCGA-A7-A6VX	>60	Post	Ductal/NST	NA	I+II	Positive	Positive	Negative	10.5667	0	0.12544	low
TCGA-A7-A6VY	<60	Post	Ductal/NST	NA	I+II	Negative	Negative	Negative	8.86667	0	-0.0850755	low
TCGA-A8-A06O	<60	Post	Ductal/NST	NA	I+II	Positive	Positive	Negative	13.2	0	0.251247	high
TCGA-A8-A06P	>60	Post	Ductal/NST	NA	III+IV	Positive	Positive	Negative	13.2	0	0.293438	high
TCGA-A8-A06Q	>60	Post	Ductal/NST	NA	III+IV	Positive	Positive	Negative	1.03333	0	0.590956	high
TCGA-A8-A06R	>60	Post	Ductal/NST	NA	I+II	Positive	Negative	Positive	18.2333	0	-0.446404	low
TCGA-A8-A06T	>60	Post	Ductal/NST	NA	III+IV	Positive	Positive	Positive	53.8	0	-0.494105	low
TCGA-A8-A06U	>60	Post	Ductal/NST	NA	I+II	Positive	Positive	Positive	29.4333	1	-0.240043	low
TCGA-A8-A06X	>60	Post	Ductal/NST	NA	I+II	Positive	Negative	Positive	31.4333	1	-0.222505	low
TCGA-A8-A06Y	>60	Post	Ductal/NST	NA	I+II	Positive	Positive	Negative	26.3667	0	-0.159726	low
TCGA-A8-A06Z	>60	Post	Ductal/NST	NA	I+II	Positive	Positive	Negative	1.03333	0	0.433123	high
TCGA-A8-A075	<60	Pre	Ductal/NST	NA	I+II	Positive	Positive	Positive	17.2667	0	-0.318669	low
TCGA-A8-A076	>60	Post	Ductal/NST	NA	I+II	Positive	Positive	Positive	54.7333	0	0.360896	high
TCGA-A8-A079	>60	Post	Ductal/NST	NA	III+IV	Positive	Positive	Negative	9.13333	0	0.129139	low
TCGA-A8-A07B	>60	Post	Ductal/NST	NA	I+II	Positive	Positive	Positive	43.6	0	-0.295698	low
TCGA-A8-A07C	<60	Post	Ductal/NST	NA	I+II	Negative	Negative	Negative	34.4667	0	-0.201228	low
TCGA-A8-A07F	>60	Post	Ductal/NST	NA	I+II	Positive	Positive	Negative	19.2333	0	0.126215	low
TCGA-A8-A07G	>60	Post	Ductal/NST	NA	I+II	Positive	Positive	Negative	19.2333	0	0.16005	low
TCGA-A8-A07I	>60	Post	Ductal/NST	NA	III+IV	Positive	Negative	Positive	14.2	0	0.327001	high
TCGA-A8-A07J	<60	Pre	Ductal/NST	NA	I+II	Positive	Positive	Negative	12.1667	0	0.533773	high
TCGA-A8-A07L	<60	Post	Ductal/NST	NA	III+IV	Positive	Positive	Negative	32.5	0	0.109471	low
TCGA-A8-A07O	<60	Post	Ductal/NST	NA	I+II	Negative	Negative	Negative	10.1333	0	-0.125212	low
TCGA-A8-A07P	>60	Post	Ductal/NST	NA	I+II	Positive	Positive	Positive	11.1333	0	-0.187216	low
TCGA-A8-A07R	>60	Pre	Ductal/NST	NA	III+IV	Negative	Negative	Positive	9.1	0	0.607386	high
TCGA-A8-A07S	>60	Post	Other	NA	I+II	Positive	Negative	Negative	8.1	0	0.0267265	low
TCGA-A8-A07U	>60	Post	Ductal/NST	NA	III+IV	Negative	Positive	Negative	25.3333	0	0.0227187	low
TCGA-A8-A07W	>60	Post	Ductal/NST	NA	III+IV	Positive	Positive	Negative	10.1333	0	0.705902	high
TCGA-A8-A07Z	>60	Post	Ductal/NST	NA	I+II	Positive	Positive	Negative	45.7	0	-0.0801053	low
TCGA-A8-A082	<60	Post	Ductal/NST	NA	I+II	Positive	Positive	Negative	18.3	0	0.429867	high
TCGA-A8-A084	>60	Post	Ductal/NST	NA	I+II	Positive	Negative	Negative	15.2667	0	-0.410226	low
TCGA-A8-A085	<60	Pre	Ductal/NST	NA	NA	Positive	Positive	Negative	37.4667	0	0.168504	high
TCGA-A8-A086	<60	Post	Ductal/NST	NA	I+II	Positive	Positive	Negative	13.2	0	0.270724	high
TCGA-A8-A08B	<60	Pre	Ductal/NST	NA	I+II	Positive	Negative	Positive	38.5333	0	-0.131173	low
TCGA-A8-A08C	>60	Post	Ductal/NST	NA	I+II	Positive	Positive	Positive	29.3667	0	-0.175814	low
TCGA-A8-A08F	<60	Post	Ductal/NST	NA	III+IV	Positive	Positive	Negative	33.4667	0	-0.0316742	low
TCGA-A8-A08G	<60	Pre	Ductal/NST	NA	I+II	Positive	Positive	Positive	20.2333	0	0.151398	low
TCGA-A8-A08I	<60	Post	Ductal/NST	NA	I+II	Positive	Positive	Negative	12.1667	0	-0.468903	low
TCGA-A8-A08J	<60	Post	Ductal/NST	NA	III+IV	Positive	Negative	Negative	37.5667	1	0.229936	high
TCGA-A8-A08L	>60	Post	Ductal/NST	NA	III+IV	Positive	Negative	Negative	10.1333	1	-0.0594922	low
TCGA-A8-A08O	<60	Pre	Ductal/NST	NA	III+IV	Positive	Positive	Negative	31.4333	0	0.472791	high
TCGA-A8-A08P	>60	Post	Ductal/NST	NA	III+IV	Positive	Positive	Positive	31.4333	0	0.180595	high
TCGA-A8-A08S	>60	Post	Ductal/NST	NA	I+II	Positive	Positive	Positive	33.4667	0	-0.0924208	low
TCGA-A8-A08T	>60	Post	Ductal/NST	NA	III+IV	Positive	Positive	Positive	113.633	1	-0.019593	low
TCGA-A8-A08X	<60	Pre	Ductal/NST	NA	III+IV	Negative	Negative	Positive	43.6	0	0.0183052	low
TCGA-A8-A091	>60	Post	Ductal/NST	NA	I+II	Positive	Negative	Negative	33.4667	0	0.254086	high
TCGA-A8-A092	<60	Pre	Ductal/NST	NA	III+IV	Positive	Positive	Negative	31.4	0	0.568185	high
TCGA-A8-A093	>60	Post	Ductal/NST	NA	I+II	Positive	Positive	Negative	18.2	0	0.0723788	low
TCGA-A8-A095	<60	Pre	Ductal/NST	NA	I+II	Positive	Positive	Negative	42.5667	0	0.27312	high
TCGA-A8-A097	>60	Post	Ductal/NST	NA	I+II	Positive	Positive	Positive	12.1667	0	0.206348	high
TCGA-A8-A09B	<60	Post	Ductal/NST	NA	III+IV	Positive	Positive	Negative	12.1667	0	0.402387	high
TCGA-A8-A09D	<60	Post	Ductal/NST	NA	I+II	Positive	Positive	Negative	50.7333	0	0.475782	high
TCGA-A8-A09E	>60	Post	Ductal/NST	NA	III+IV	Positive	Positive	Positive	49.7333	0	0.679022	high
TCGA-A8-A09I	>60	Post	Ductal/NST	NA	I+II	Positive	Positive	Positive	45.7	0	-0.203945	low
TCGA-A8-A09K	>60	Post	Ductal/NST	NA	I+II	Positive	Positive	Negative	30.4	0	-1.54937	low
TCGA-A8-A09M	>60	Post	Ductal/NST	NA	III+IV	Positive	Positive	Negative	33.5333	0	-0.35287	low
TCGA-A8-A09N	<60	Post	Ductal/NST	NA	III+IV	Positive	Positive	Positive	1.03333	0	-0.0855228	low
TCGA-A8-A09Q	>60	Post	Ductal/NST	NA	III+IV	Positive	Positive	Negative	25.3667	0	-0.0153382	low
TCGA-A8-A09R	>60	Post	Ductal/NST	NA	I+II	Positive	Positive	Negative	9.1	0	-0.11467	low
TCGA-A8-A09V	<60	Pre	Other	NA	I+II	Positive	Positive	Negative	15.2333	0	0.418151	high
TCGA-A8-A09X	>60	Post	Other	NA	III+IV	Negative	Negative	Negative	14.2	1	0.0842079	low
TCGA-A8-A0A1	>60	Post	Other	NA	I+II	Positive	Positive	Negative	12.1667	0	-0.00901616	low
TCGA-A8-A0A2	>60	Post	Other	NA	I+II	Positive	Positive	Negative	19.3	0	-0.0626581	low
TCGA-A8-A0A4	>60	Post	Other	NA	I+II	Positive	Positive	Negative	13.2	0	0.0638987	low
TCGA-A8-A0A6	>60	Post	Other	NA	III+IV	Positive	Positive	Negative	21.3333	0	-0.0300289	low
TCGA-A8-A0A9	>60	Post	Ductal/NST	NA	I+II	Positive	Positive	Negative	27.4	0	0.414955	high
TCGA-A8-A0AB	<60	Post	Other	NA	I+II	Positive	Positive	Positive	17.2667	0	0.835297	high
TCGA-A8-A0AD	>60	Post	Other	NA	I+II	Positive	Positive	Negative	38.5667	0	-0.120881	low
TCGA-AC-A23C	>60	Post	Ductal/NST	NA	I+II	Positive	Positive	Positive	19.5	0	0.0714965	low
TCGA-AC-A23E	<60	Pre	Ductal/NST	NA	I+II	Positive	Positive	NA	23.2667	0	0.561715	high
TCGA-AC-A23G	>60	Post	Other	NA	I+II	Positive	Positive	Positive	74.9333	0	-0.030709	low
TCGA-AC-A23H	>60	Post	Ductal/NST	NA	I+II	Positive	Negative	Positive	5.8	1	0.559833	high
TCGA-AC-A2B8	>60	Post	Other	NA	I+II	Positive	Positive	Negative	22.5667	0	0.37366	high
TCGA-AC-A2BK	>60	Post	Ductal/NST	NA	III+IV	Negative	Negative	Negative	74.0667	0	1.01166	high
TCGA-AC-A2BM	<60	Pre	Ductal/NST	NA	I+II	Positive	Positive	NA	100.733	0	-0.376177	low
TCGA-AC-A2FB	>60	Pre	Other	NA	I+II	Positive	Positive	Positive	41.1333	0	-0.516142	low
TCGA-AC-A2FE	>60	Post	Other	NA	III+IV	Positive	Positive	NA	87.8667	1	-0.169378	low
TCGA-AC-A2FF	<60	Pre	Other	NA	I+II	Positive	Positive	NA	91.9667	0	-0.0031169	low
TCGA-AC-A2FG	>60	Post	Other	NA	I+II	Positive	Negative	NA	61.7667	0	0.0206335	low
TCGA-AC-A2FM	>60	Post	Other	NA	I+II	NA	NA	NA	26.4	1	-0.177525	low
TCGA-AC-A2FO	>60	Post	Other	NA	I+II	Positive	Negative	Negative	75.1667	0	-0.0218639	low
TCGA-AC-A2QH	<60	Post	Other	NA	I+II	Negative	Negative	Negative	33.5	0	0.0882475	low
TCGA-AC-A2QI	>60	Post	Other	NA	III+IV	Positive	Negative	Negative	19.6	0	0.143913	low
TCGA-AC-A2QJ	<60	Pre	Other	NA	III+IV	Negative	Negative	Negative	14.8667	1	-0.144127	low
TCGA-AC-A3BB	<60	Pre	Other	NA	III+IV	Positive	Positive	Negative	32.9	0	-0.290461	low
TCGA-AC-A3EH	>60	Post	Other	NA	III+IV	Positive	Negative	Negative	6.56667	1	0.203736	high
TCGA-AC-A3HN	>60	Post	Other	NA	I+II	Positive	Positive	Negative	16.5333	0	0.205275	high
TCGA-AC-A3OD	>60	Post	Other	NA	I+II	Positive	Positive	Negative	15.0333	0	-0.747449	low
TCGA-AC-A3QP	>60	Post	Other	NA	I+II	Positive	Positive	Negative	22.5	0	0.187284	high
TCGA-AC-A3QQ	<60	Pre	Other	NA	I+II	Positive	Positive	Positive	24.4667	0	-0.49773	low
TCGA-AC-A3TM	<60	Pre	Other	NA	III+IV	Positive	Positive	Negative	25.4	0	-0.33413	low
TCGA-AC-A3TN	>60	Post	Other	NA	I+II	Positive	Positive	Positive	15.2	0	0.0270576	low
TCGA-AC-A3W5	>60	Pre	Other	NA	I+II	Positive	Positive	NA	16.8	0	0.118236	low
TCGA-AC-A3W6	>60	Post	Other	NA	III+IV	Positive	Positive	Negative	20.0667	0	-0.272199	low
TCGA-AC-A3W7	>60	Post	Other	NA	I+II	Positive	Negative	Negative	15.7	0	0.0333554	low
TCGA-AC-A3YJ	>60	Post	Other	NA	I+II	Positive	Positive	NA	25.1333	0	0.208937	high
TCGA-AC-A4ZE	>60	Post	Other	NA	I+II	Positive	Positive	Positive	29.6667	0	0.151013	low
TCGA-AC-A5EH	>60	Pre	Ductal/NST	NA	I+II	Positive	Negative	Negative	17.0333	0	0.291626	high
TCGA-AC-A5XS	>60	Pre	Other	NA	I+II	Positive	Positive	Negative	19.6	0	-0.367427	low
TCGA-AC-A5XU	>60	Pre	Ductal/NST	NA	I+II	Positive	Positive	Negative	15.1667	0	-0.0143111	low
TCGA-AC-A62V	<60	Pre	Ductal/NST	NA	NA	Positive	Positive	NA	11.6	1	0.156581	low
TCGA-AC-A62X	>60	Post	Ductal/NST	NA	I+II	Positive	Negative	NA	13.9	0	0.0257056	low
TCGA-AC-A62Y	>60	Post	Other	NA	I+II	Positive	Positive	Negative	17.6667	0	-0.0209477	low
TCGA-AC-A6IV	<60	Pre	Other	NA	I+II	Positive	Positive	Negative	18.9333	0	0.28283	high
TCGA-AC-A6IW	>60	Post	Ductal/NST	NA	I+II	Negative	Negative	Negative	13.7667	0	0.0207056	low
TCGA-AC-A6IX	<60	Pre	Other	NA	III+IV	Positive	Positive	NA	12.4333	0	0.0743667	low
TCGA-AC-A6NO	<60	Pre	Ductal/NST	NA	I+II	Positive	Positive	Negative	1.7	0	-0.350719	low
TCGA-AC-A7VB	<60	Pre	Ductal/NST	NA	I+II	Positive	Negative	NA	8.33333	0	0.180273	high
TCGA-AC-A8OP	>60	Post	Ductal/NST	NA	I+II	Positive	Positive	Negative	20.4667	0	-0.518684	low
TCGA-AC-A8OQ	>60	Post	Ductal/NST	NA	I+II	Negative	Negative	NA	1.13333	0	-0.387121	low
TCGA-AC-A8OR	>60	Post	Other	NA	I+II	Positive	Positive	Negative	1.33333	0	0.452759	high
TCGA-AC-A8OS	>60	Post	Other	NA	I+II	Positive	Positive	Positive	2.33333	0	-0.286001	low
TCGA-AN-A04A	<60	Pre	Ductal/NST	NA	III+IV	Positive	Positive	Negative	3	0	-0.276123	low
TCGA-AN-A04C	<60	Post	Ductal/NST	NA	I+II	Negative	Negative	Positive	1.8	0	0.400958	high
TCGA-AN-A04D	<60	Post	Ductal/NST	NA	I+II	Negative	Negative	Negative	1.73333	0	0.124199	low
TCGA-AN-A0AJ	>60	Post	Ductal/NST	NA	I+II	Positive	Positive	Positive	10.1	0	-0.248862	low
TCGA-AN-A0AK	>60	Post	Ductal/NST	NA	I+II	Positive	Negative	Positive	7.46667	0	-0.22606	low
TCGA-AN-A0AL	<60	Pre	Ductal/NST	NA	III+IV	Negative	Negative	Negative	7.56667	0	0.0491888	low
TCGA-AN-A0FD	>60	Post	Ductal/NST	NA	I+II	Positive	Positive	Positive	6.53333	0	-0.845127	low
TCGA-AN-A0FF	<60	Pre	Ductal/NST	NA	I+II	Positive	Positive	Negative	5.73333	0	0.0734186	low
TCGA-AN-A0FJ	<60	Pre	Ductal/NST	NA	III+IV	Positive	Negative	Positive	8.06667	0	-0.459221	low
TCGA-AN-A0FK	>60	Post	Ductal/NST	NA	III+IV	Positive	Positive	Positive	7.1	0	0.561474	high
TCGA-AN-A0FL	>60	Post	Ductal/NST	NA	I+II	Negative	Negative	Positive	7.7	0	0.0751503	low
TCGA-AN-A0FN	>60	Post	Other	NA	I+II	Positive	Positive	Positive	7.26667	0	-0.0137326	low
TCGA-AN-A0FS	<60	Pre	Other	NA	I+II	Positive	Negative	Positive	7	0	0.00738498	low
TCGA-AN-A0FT	>60	Post	Ductal/NST	NA	I+II	Positive	Positive	Positive	7.13333	0	0.0263569	low
TCGA-AN-A0XL	>60	Post	Ductal/NST	NA	I+II	Positive	Positive	Negative	5.43333	0	0.0477917	low
TCGA-AN-A0XO	<60	Post	Ductal/NST	NA	III+IV	Positive	Negative	Negative	12.5	0	-0.0753964	low
TCGA-AN-A0XV	>60	Post	Ductal/NST	NA	III+IV	Positive	Positive	Positive	5.4	0	-0.202059	low
TCGA-AN-A0XW	<60	Pre	Ductal/NST	NA	III+IV	Positive	Positive	Positive	5.66667	0	-0.470863	low
TCGA-AO-A03L	<60	Pre	Ductal/NST	NA	III+IV	Positive	Positive	Positive	81.4	0	-0.111477	low
TCGA-AO-A03M	<60	Pre	Ductal/NST	NA	I+II	Positive	Positive	Negative	62.2	0	-0.36319	low
TCGA-AO-A03N	<60	Post	Ductal/NST	NA	I+II	Positive	Positive	Negative	67.7	0	0.134092	low
TCGA-AO-A03O	>60	Post	Ductal/NST	NA	I+II	Positive	Positive	Negative	82.7667	1	0.23188	high
TCGA-AO-A03P	<60	Post	Ductal/NST	NA	I+II	Positive	Positive	Negative	97.0333	1	-0.103226	low
TCGA-AO-A03V	<60	Pre	Ductal/NST	NA	I+II	Positive	Positive	Negative	45.0333	0	0.340893	high
TCGA-AO-A0J2	<60	Pre	Ductal/NST	NA	I+II	Negative	Negative	Negative	33.2333	0	-0.549855	low
TCGA-AO-A0J3	>60	Post	Other	NA	I+II	Positive	Positive	Negative	21.7	0	-0.545194	low
TCGA-AO-A0J4	<60	Pre	Ductal/NST	NA	I+II	Negative	Negative	Negative	52.9	0	-0.0813252	low
TCGA-AO-A0J5	<60	Pre	Other	NA	III+IV	Positive	Negative	Negative	26.4	1	0.415285	high
TCGA-AO-A0J6	>60	Post	Ductal/NST	NA	I+II	Negative	Negative	Negative	38	0	-0.0429954	low
TCGA-AO-A0J7	>60	Post	Other	NA	I+II	Positive	Positive	Negative	20.6	0	0.230421	high
TCGA-AO-A0J8	>60	Post	Other	NA	I+II	Positive	Positive	Negative	22.6667	0	-0.0208659	low
TCGA-AO-A0J9	>60	Post	Other	NA	III+IV	Positive	Positive	NA	53.7667	0	-0.152989	low
TCGA-AO-A0JA	<60	Pre	Ductal/NST	NA	III+IV	Positive	Positive	Negative	21.8333	0	0.282029	high
TCGA-AO-A0JC	>60	Post	Ductal/NST	NA	I+II	Positive	Positive	Negative	51.5667	0	-0.889249	low
TCGA-AO-A0JD	<60	Post	Ductal/NST	NA	III+IV	Positive	Positive	Negative	73	0	0.0647254	low
TCGA-AO-A0JE	<60	Post	Ductal/NST	NA	III+IV	Negative	Negative	Positive	77.8333	0	0.0499796	low
TCGA-AO-A0JF	>60	Post	Ductal/NST	NA	I+II	Positive	Positive	Negative	66	0	0.167793	low
TCGA-AO-A0JG	<60	Post	Other	NA	III+IV	Positive	Positive	Negative	26.6	0	-0.0608043	low
TCGA-AO-A0JI	<60	Post	Ductal/NST	NA	I+II	Positive	Negative	Negative	50.9333	0	-0.285057	low
TCGA-AO-A0JJ	<60	Post	Other	NA	I+II	Positive	Positive	Negative	62.9	0	-0.0324686	low
TCGA-AO-A0JL	<60	Post	Ductal/NST	NA	III+IV	Negative	Negative	Negative	56.1	0	-0.588488	low
TCGA-AO-A0JM	<60	Pre	Ductal/NST	NA	I+II	Positive	Positive	Positive	72.8	0	-0.252558	low
TCGA-AO-A124	<60	Pre	Other	NA	I+II	Negative	Negative	Negative	116.867	0	0.0155117	low
TCGA-AO-A125	>60	Post	Other	NA	I+II	Positive	Positive	Negative	115.2	0	-0.18049	low
TCGA-AO-A126	<60	Pre	Ductal/NST	NA	I+II	Positive	Positive	Negative	110.233	0	-0.199443	low
TCGA-AO-A128	>60	Post	Ductal/NST	NA	I+II	Negative	Negative	Negative	108.267	0	-0.250284	low
TCGA-AO-A129	<60	Pre	Ductal/NST	NA	I+II	Negative	Negative	Negative	109.533	0	-0.049581	low
TCGA-AO-A12A	<60	Pre	Ductal/NST	NA	I+II	Positive	Positive	Negative	103.733	0	-0.154416	low
TCGA-AO-A12B	>60	Post	Ductal/NST	NA	I+II	Positive	Positive	Negative	99.6333	0	0.149627	low
TCGA-AO-A12C	<60	Pre	Ductal/NST	NA	I+II	Positive	Positive	Positive	79.0667	0	-0.044778	low
TCGA-AO-A12D	<60	Pre	Ductal/NST	NA	I+II	Negative	Negative	Positive	83.8333	0	-0.234046	low
TCGA-AO-A12E	<60	Pre	Other	NA	I+II	Positive	Positive	Negative	71.4	0	0.0747788	low
TCGA-AO-A12F	<60	Pre	Ductal/NST	NA	I+II	Negative	Negative	Negative	61.4	0	0.428303	high
TCGA-AO-A12G	>60	Post	Other	NA	I+II	Positive	Positive	Positive	54.6333	0	0.346622	high
TCGA-AO-A12H	>60	Pre	Other	NA	I+II	Positive	Positive	Negative	41.1333	0	0.720685	high
TCGA-AO-A1KP	>60	Post	Ductal/NST	NA	I+II	Positive	Positive	Negative	98.4333	0	-0.0864055	low
TCGA-AO-A1KQ	>60	Pre	Ductal/NST	NA	NA	Positive	Positive	Negative	62.7333	0	-0.519347	low
TCGA-AO-A1KR	<60	Pre	Ductal/NST	NA	I+II	Negative	Negative	Negative	83.7667	0	-0.536063	low
TCGA-AO-A1KS	>60	Post	Other	NA	I+II	Positive	Positive	Negative	11.6667	0	0.24047	high
TCGA-AO-A1KT	>60	Post	Ductal/NST	NA	I+II	Positive	Positive	Negative	18.0333	0	-0.0409576	low
TCGA-AQ-A04H	>60	Post	Ductal/NST	NA	III+IV	Positive	Positive	Negative	25.1333	0	-0.212851	low
TCGA-AQ-A04J	<60	Pre	Ductal/NST	NA	I+II	Negative	Negative	Negative	27.3	0	0.445989	high
TCGA-AQ-A04L	<60	Pre	Ductal/NST	NA	I+II	Positive	Negative	Positive	131.9	0	0.176136	high
TCGA-AQ-A0Y5	>60	Post	Ductal/NST	NA	III+IV	Positive	Positive	Positive	5.73333	1	0.774928	high
TCGA-AQ-A1H2	>60	Post	Ductal/NST	NA	III+IV	Positive	Positive	Negative	15.8333	0	0.0313069	low
TCGA-AQ-A1H3	<60	Pre	Ductal/NST	NA	III+IV	Positive	Positive	Negative	32.9667	0	0.0193514	low
TCGA-AQ-A54N	<60	Post	Ductal/NST	NA	I+II	Negative	Negative	Negative	2.6	0	-0.493366	low
TCGA-AQ-A54O	<60	Pre	Ductal/NST	NA	NA	Positive	Positive	Negative	33.3667	0	-0.0631997	low
TCGA-AQ-A7U7	<60	Post	Other	NA	III+IV	Positive	Positive	Negative	19.4667	1	-0.103027	low
TCGA-AR-A0TP	<60	Pre	Ductal/NST	NA	I+II	Positive	Negative	Negative	142.5	0	0.230794	high
TCGA-AR-A0TQ	<60	Pre	Ductal/NST	NA	III+IV	Positive	Negative	Negative	99.7	0	-0.257544	low
TCGA-AR-A0TR	>60	Post	Ductal/NST	NA	I+II	Positive	Positive	Negative	5.33333	1	-0.158783	low
TCGA-AR-A0TS	<60	Pre	Ductal/NST	NA	I+II	Negative	Negative	Negative	85.2667	0	0.0953097	low
TCGA-AR-A0TT	<60	Pre	Ductal/NST	NA	III+IV	Positive	Negative	Negative	110.533	0	-0.261118	low
TCGA-AR-A0TU	<60	Pre	Ductal/NST	NA	I+II	Negative	Negative	Negative	23.6333	0	0.0519898	low
TCGA-AR-A0TV	>60	Post	Ductal/NST	NA	I+II	Positive	Positive	Negative	76.2667	0	-0.430239	low
TCGA-AR-A0TW	<60	Pre	Ductal/NST	NA	III+IV	Positive	Positive	Negative	100.3	0	-0.251322	low
TCGA-AR-A0TX	>60	Post	Ductal/NST	NA	I+II	Positive	Positive	Positive	65.7333	0	-0.116217	low
TCGA-AR-A0TY	<60	Post	Ductal/NST	NA	I+II	Positive	Negative	Negative	56.6333	1	0.390113	high
TCGA-AR-A0U0	>60	Post	Ductal/NST	NA	I+II	Negative	Negative	NA	66.2667	0	0.174049	high
TCGA-AR-A0U2	<60	Pre	Ductal/NST	NA	III+IV	Positive	Positive	Negative	85.0333	1	0.0675084	low
TCGA-AR-A0U3	<60	Post	Ductal/NST	NA	I+II	Positive	Positive	Negative	136	0	-0.479181	low
TCGA-AR-A0U4	<60	Pre	Ductal/NST	NA	I+II	Negative	Negative	Negative	108.7	0	0.318407	high
TCGA-AR-A1AH	<60	Post	Ductal/NST	NA	I+II	Positive	Negative	Negative	126.9	0	0.560967	high
TCGA-AR-A1AI	<60	Post	Other	NA	I+II	Negative	Negative	Negative	109.867	0	-0.190059	low
TCGA-AR-A1AJ	>60	Post	Ductal/NST	NA	I+II	Positive	Negative	Negative	102.4	0	0.306764	high
TCGA-AR-A1AK	>60	Post	Other	NA	I+II	Positive	Positive	Negative	105.3	0	-0.00205874	low
TCGA-AR-A1AL	<60	Post	Other	NA	III+IV	Positive	Positive	Negative	99.0333	0	-0.193838	low
TCGA-AR-A1AM	<60	Post	Other	NA	III+IV	Positive	Positive	Negative	99.7	0	-0.129012	low
TCGA-AR-A1AN	<60	Pre	Ductal/NST	NA	I+II	Positive	Positive	Negative	97.3333	0	0.066046	low
TCGA-AR-A1AP	>60	Post	Ductal/NST	NA	I+II	Positive	Positive	Negative	95.2	0	0.18271	high
TCGA-AR-A1AQ	<60	Post	Ductal/NST	NA	I+II	Negative	Negative	Negative	100.7	0	-0.800464	low
TCGA-AR-A1AR	<60	Post	Ductal/NST	NA	III+IV	Negative	Negative	Negative	17.4667	1	0.699331	high
TCGA-AR-A1AS	<60	Post	Ductal/NST	NA	I+II	Positive	Positive	Negative	38.3333	0	0.719926	high
TCGA-AR-A1AT	>60	Post	Other	NA	I+II	Positive	Positive	Positive	42.4	1	0.131332	low
TCGA-AR-A1AU	<60	Pre	Ductal/NST	NA	III+IV	Positive	Positive	Negative	95.6	0	0.209451	high
TCGA-AR-A1AV	>60	Pre	Ductal/NST	NA	NA	Positive	Positive	Negative	62.1333	0	0.51602	high
TCGA-AR-A1AW	>60	Post	Ductal/NST	NA	I+II	Positive	Positive	Negative	87.7333	0	-0.75573	low
TCGA-AR-A1AX	>60	Post	Ductal/NST	NA	I+II	Positive	Positive	Positive	87.6333	0	-0.225089	low
TCGA-AR-A1AY	>60	Post	Ductal/NST	NA	I+II	Negative	Negative	Negative	34.2	0	-0.0184422	low
TCGA-AR-A24H	>60	Post	Other	NA	I+II	Positive	Positive	Negative	163.133	0	-0.220851	low
TCGA-AR-A24K	<60	Pre	Ductal/NST	NA	I+II	Positive	Positive	Negative	51.6	0	-0.0360339	low
TCGA-AR-A24L	<60	Pre	Ductal/NST	NA	I+II	Positive	Positive	Negative	95.5333	1	0.0378564	low
TCGA-AR-A24M	<60	Pre	Other	NA	III+IV	Positive	Positive	Negative	122	0	0.164428	low
TCGA-AR-A24N	<60	Pre	Ductal/NST	NA	I+II	Positive	Positive	Negative	101.167	0	-0.101599	low
TCGA-AR-A24O	<60	Pre	Other	NA	III+IV	Positive	Positive	Negative	120.233	0	0.0832621	low
TCGA-AR-A24P	<60	Post	Ductal/NST	NA	I+II	Positive	Positive	Negative	2.8	0	-0.064288	low
TCGA-AR-A24Q	<60	Post	Ductal/NST	NA	I+II	Positive	Negative	Negative	105.733	0	0.135877	low
TCGA-AR-A24R	<60	Pre	Ductal/NST	NA	III+IV	Positive	Positive	Negative	114.333	0	-0.415344	low
TCGA-AR-A24S	>60	Post	Ductal/NST	NA	I+II	Positive	Positive	Negative	99.2	0	0.379084	high
TCGA-AR-A24T	<60	Pre	Other	NA	III+IV	Positive	Positive	Negative	106.733	0	0.0943241	low
TCGA-AR-A24U	<60	Pre	Ductal/NST	NA	I+II	Negative	Negative	Positive	104.267	0	0.479351	high
TCGA-AR-A24V	<60	Pre	Ductal/NST	NA	I+II	Positive	Positive	Negative	106.767	0	0.338199	high
TCGA-AR-A24W	<60	Post	Ductal/NST	NA	I+II	Positive	Positive	Negative	51.6667	0	0.230967	high
TCGA-AR-A24X	<60	Pre	Other	NA	I+II	Positive	Positive	Negative	100.133	0	0.0565402	low
TCGA-AR-A24Z	<60	Post	Ductal/NST	NA	I+II	Positive	Positive	Negative	100.033	0	0.643244	high
TCGA-AR-A250	<60	Post	Ductal/NST	NA	I+II	Positive	Negative	Negative	90.2333	0	-0.0171472	low
TCGA-AR-A251	<60	Pre	Ductal/NST	NA	III+IV	Positive	Negative	Negative	101	0	0.853202	high
TCGA-AR-A252	<60	Pre	Ductal/NST	NA	I+II	Positive	Positive	Negative	94.6	0	-0.374275	low
TCGA-AR-A254	<60	Pre	Ductal/NST	NA	III+IV	Positive	Positive	Positive	86.8333	0	-0.109669	low
TCGA-AR-A255	>60	Post	Ductal/NST	NA	I+II	Positive	Positive	Positive	72.0333	0	0.336734	high
TCGA-AR-A256	<60	Pre	Ductal/NST	NA	I+II	Negative	Negative	Negative	95.1333	1	0.727093	high
TCGA-AR-A2LE	>60	Post	Other	NA	I+II	Positive	Negative	NA	168.733	0	-0.838506	low
TCGA-AR-A2LJ	<60	Pre	Other	NA	III+IV	Positive	Positive	Positive	87.7333	0	0.162095	low
TCGA-AR-A2LK	>60	Post	Other	NA	III+IV	Positive	Positive	Negative	54.9667	1	1.00692	high
TCGA-AR-A2LL	>60	Post	Other	NA	I+II	Positive	Positive	Negative	67.0667	0	0.381511	high
TCGA-AR-A2LM	<60	Pre	Other	NA	I+II	Positive	Positive	NA	64.5	0	0.0784004	low
TCGA-AR-A2LN	>60	Post	Other	NA	I+II	Positive	Positive	Negative	38.7	0	-0.130191	low
TCGA-AR-A2LO	<60	Pre	Other	NA	I+II	Positive	Positive	Negative	39.9333	0	0.0472084	low
TCGA-AR-A2LR	<60	Post	Other	NA	I+II	Negative	Negative	Negative	58.0667	0	0.310603	high
TCGA-AR-A5QM	>60	Post	Other	NA	I+II	Positive	Positive	Negative	74.3667	0	-0.0102999	low
TCGA-AR-A5QN	>60	Post	Other	NA	III+IV	Positive	Positive	Positive	33.7667	0	-0.39248	low
TCGA-AR-A5QP	<60	Post	Other	NA	I+II	Positive	Positive	Negative	39.5	0	-0.0707167	low
TCGA-AR-A5QQ	>60	Post	Other	NA	III+IV	Negative	Negative	Negative	10.7333	1	-0.395839	low
TCGA-B6-A0I1	>60	Post	Ductal/NST	NA	I+II	Negative	Negative	NA	78.7	1	0.649969	high
TCGA-B6-A0I2	<60	Pre	Ductal/NST	NA	I+II	NA	NA	NA	145.367	0	-1.43343	low
TCGA-B6-A0I5	<60	Pre	Ductal/NST	NA	I+II	Positive	Positive	NA	285.2	0	-0.691225	low
TCGA-B6-A0I6	<60	Pre	Ductal/NST	NA	I+II	Negative	Negative	NA	33.0333	1	0.60012	high
TCGA-B6-A0IA	<60	Pre	Other	NA	I+II	Positive	Positive	NA	279.7	0	0.0710974	low
TCGA-B6-A0IB	>60	Pre	Ductal/NST	NA	III+IV	Positive	Positive	NA	131.367	1	0.191122	high
TCGA-B6-A0IE	<60	Pre	Other	NA	III+IV	Negative	Negative	NA	66.4333	1	0.0716821	low
TCGA-B6-A0IG	<60	Pre	Ductal/NST	NA	I+II	Positive	Positive	NA	148.533	1	-0.0522668	low
TCGA-B6-A0IH	>60	Post	Other	NA	III+IV	Positive	Positive	NA	113.933	1	0.265096	high
TCGA-B6-A0IJ	<60	Pre	Ductal/NST	NA	I+II	Positive	Positive	NA	236.867	0	0.00166887	low
TCGA-B6-A0IK	>60	Pre	Ductal/NST	NA	III+IV	Negative	Negative	NA	19.0333	1	0.653569	high
TCGA-B6-A0IM	>60	Post	Other	NA	I+II	Positive	Positive	NA	129.1	1	0.380019	high
TCGA-B6-A0IP	>60	Post	Other	NA	I+II	Positive	Positive	NA	130.867	1	0.153062	low
TCGA-B6-A0IQ	<60	Pre	Ductal/NST	NA	III+IV	Negative	Negative	NA	142.833	0	-0.731277	low
TCGA-B6-A0RG	<60	Pre	Ductal/NST	NA	I+II	Negative	Negative	NA	69.4	0	-0.401752	low
TCGA-B6-A0RH	<60	Pre	Ductal/NST	NA	I+II	Positive	Positive	NA	215.2	1	0.0092013	low
TCGA-B6-A0RI	<60	Pre	Ductal/NST	NA	III+IV	Positive	Positive	NA	237.533	0	0.156049	low
TCGA-B6-A0RL	<60	Pre	Ductal/NST	NA	I+II	Positive	Positive	NA	82.3	1	0.95067	high
TCGA-B6-A0RN	<60	Post	Ductal/NST	NA	I+II	Negative	Negative	NA	266.933	0	-0.275	low
TCGA-B6-A0RO	>60	Post	Ductal/NST	NA	III+IV	Positive	Positive	NA	164.3	0	0.440962	high
TCGA-B6-A0RS	<60	Pre	Ductal/NST	NA	I+II	Negative	Negative	NA	102.1	1	0.253132	high
TCGA-B6-A0RT	<60	Pre	Ductal/NST	NA	III+IV	Negative	Negative	NA	90.7	0	-0.0875894	low
TCGA-B6-A0RU	<60	Pre	Other	NA	I+II	Negative	Negative	NA	286.833	0	0.32713	high
TCGA-B6-A0RV	<60	Pre	Other	NA	III+IV	Positive	Positive	NA	171.867	0	-0.375944	low
TCGA-B6-A0WT	>60	Post	Ductal/NST	NA	I+II	Positive	Positive	NA	191.3	0	-0.178016	low
TCGA-B6-A0WV	>60	Post	Ductal/NST	NA	I+II	Positive	Positive	NA	80.5667	1	0.544179	high
TCGA-B6-A0WX	<60	Pre	Other	NA	III+IV	Negative	Negative	NA	21.3	1	0.826958	high
TCGA-B6-A0WY	<60	Pre	Ductal/NST	NA	III+IV	Positive	Negative	NA	115.367	1	0.112361	low
TCGA-B6-A0WZ	<60	Pre	Ductal/NST	NA	I+II	Positive	Positive	NA	209.733	0	0.0790604	low
TCGA-B6-A0X0	<60	Pre	Other	NA	I+II	Positive	Positive	NA	131.5	1	-0.424323	low
TCGA-B6-A0X4	>60	Post	Ductal/NST	NA	I+II	Positive	Positive	NA	28.6667	1	0.202076	high
TCGA-B6-A0X5	>60	Post	Ductal/NST	NA	I+II	Positive	Positive	NA	69.9	1	-0.0155777	low
TCGA-B6-A1KC	>60	Post	Ductal/NST	NA	I+II	Positive	Negative	Negative	44.2	0	0.220939	high
TCGA-B6-A1KF	>60	Post	Ductal/NST	NA	I+II	Negative	Negative	Negative	102.933	0	0.527811	high
TCGA-B6-A1KI	>60	Post	Ductal/NST	NA	I+II	Positive	Positive	Negative	74.5333	0	0.23482	high
TCGA-B6-A1KN	<60	Post	Ductal/NST	NA	III+IV	Negative	Negative	NA	141.1	0	0.14568	low
TCGA-B6-A2IU	>60	Pre	Other	NA	I+II	Positive	Positive	NA	172.533	0	-0.211363	low
TCGA-B6-A3ZX	<60	Pre	Other	NA	III+IV	Negative	Negative	Negative	38.4	1	0.01345	low
TCGA-B6-A400	<60	Pre	Ductal/NST	NA	III+IV	Negative	Negative	Negative	7.16667	0	0.17501	high
TCGA-B6-A401	<60	Pre	Ductal/NST	NA	I+II	Positive	Positive	Negative	86.5333	0	-0.166456	low
TCGA-B6-A402	<60	Pre	Ductal/NST	NA	I+II	Negative	Negative	Negative	76.0333	0	0.100983	low
TCGA-B6-A408	<60	Pre	Other	NA	III+IV	Positive	Positive	Negative	69.0667	0	-0.342429	low
TCGA-B6-A409	<60	Pre	Ductal/NST	NA	III+IV	Negative	Negative	Negative	19.1	1	0.400997	high
TCGA-B6-A40B	>60	Post	Other	NA	I+II	Positive	Positive	Negative	105.067	0	-0.0784654	low
TCGA-B6-A40C	<60	Pre	Other	NA	I+II	Positive	Positive	Negative	72.1333	0	0.0623173	low
TCGA-BH-A0AU	<60	Pre	Ductal/NST	NA	I+II	Positive	Positive	Positive	63.8	0	-0.137973	low
TCGA-BH-A0AV	<60	Pre	Ductal/NST	NA	I+II	Negative	Negative	NA	60.6667	0	0.866766	high
TCGA-BH-A0AW	<60	Post	Ductal/NST	NA	I+II	Positive	Negative	Positive	20.7333	0	-0.423761	low
TCGA-BH-A0AZ	<60	Pre	Ductal/NST	NA	III+IV	Positive	Positive	Negative	63.9667	0	0.211969	high
TCGA-BH-A0B0	<60	Pre	Ductal/NST	NA	I+II	Positive	Positive	Negative	82.5667	0	0.0136556	low
TCGA-BH-A0B1	>60	Post	Ductal/NST	NA	I+II	Positive	Positive	Negative	38.2667	0	0.138214	low
TCGA-BH-A0B3	<60	Post	Ductal/NST	NA	I+II	Negative	Negative	Negative	40.1	0	0.125133	low
TCGA-BH-A0B4	>60	Pre	Ductal/NST	NA	NA	Positive	Positive	Negative	39.7	0	-0.297869	low
TCGA-BH-A0B5	<60	Pre	Other	NA	III+IV	Positive	Positive	Negative	71.2	0	-0.225216	low
TCGA-BH-A0B6	<60	Pre	Ductal/NST	NA	I+II	Positive	Positive	Positive	82.7667	0	-0.594356	low
TCGA-BH-A0B7	<60	Pre	Ductal/NST	NA	I+II	Positive	Positive	Positive	85.3	0	0.156632	low
TCGA-BH-A0B8	>60	Post	Ductal/NST	NA	I+II	Positive	Positive	Negative	52.3	0	-0.0636232	low
TCGA-BH-A0B9	<60	Pre	Ductal/NST	NA	I+II	Negative	Negative	Negative	52.4	0	-0.386024	low
TCGA-BH-A0BA	<60	Pre	Other	NA	III+IV	Positive	Positive	Negative	37.7333	0	0.0461984	low
TCGA-BH-A0BC	<60	Post	Ductal/NST	NA	III+IV	Positive	Positive	Negative	32.4667	0	0.070825	low
TCGA-BH-A0BD	<60	Pre	Ductal/NST	NA	I+II	Positive	Positive	Negative	18.4667	0	0.445349	high
TCGA-BH-A0BF	<60	Post	Ductal/NST	NA	I+II	Positive	Positive	Negative	44.1333	1	-0.101372	low
TCGA-BH-A0BG	>60	Post	Ductal/NST	NA	I+II	Negative	Negative	Negative	62.3667	0	-0.609868	low
TCGA-BH-A0BJ	<60	Pre	Ductal/NST	NA	I+II	Positive	Positive	Negative	22	0	0.244599	high
TCGA-BH-A0BL	<60	Pre	Ductal/NST	NA	I+II	Negative	Negative	Negative	75.9333	0	0.059458	low
TCGA-BH-A0BM	<60	Post	Ductal/NST	NA	I+II	Positive	Negative	Negative	62.5333	0	-0.648718	low
TCGA-BH-A0BO	<60	Pre	Ductal/NST	NA	I+II	Positive	Positive	Negative	73.2333	0	0.00903615	low
TCGA-BH-A0BP	>60	Post	Ductal/NST	NA	I+II	Positive	Positive	Negative	76.5333	1	0.1809	high
TCGA-BH-A0BQ	<60	Pre	Ductal/NST	NA	I+II	Positive	Positive	Positive	75.1667	0	-0.329328	low
TCGA-BH-A0BR	<60	Post	Ductal/NST	NA	I+II	Positive	Positive	Negative	77.6667	0	0.259971	high
TCGA-BH-A0BT	<60	Pre	Ductal/NST	NA	I+II	Positive	Positive	Negative	78.8333	0	-0.287051	low
TCGA-BH-A0BV	>60	Post	Ductal/NST	NA	I+II	Positive	Positive	Negative	50.6333	0	0.388429	high
TCGA-BH-A0BW	>60	Post	Ductal/NST	NA	I+II	Negative	Negative	NA	79.0333	0	-0.227688	low
TCGA-BH-A0BZ	<60	Post	Ductal/NST	NA	III+IV	Positive	Positive	Negative	75.1667	0	-0.0822218	low
TCGA-BH-A0C0	>60	Post	Ductal/NST	NA	I+II	Positive	Positive	Negative	42.3333	0	-0.502506	low
TCGA-BH-A0C1	>60	Post	Other	NA	III+IV	Positive	Positive	Negative	47.0333	1	0.1526	low
TCGA-BH-A0C3	<60	Pre	Other	NA	I+II	Positive	Negative	Negative	90.3	0	-0.163664	low
TCGA-BH-A0C7	<60	Pre	Ductal/NST	NA	I+II	Positive	Negative	NA	92.2333	0	-0.298941	low
TCGA-BH-A0DD	<60	Pre	Ductal/NST	NA	NA	Positive	Positive	Positive	82.8667	0	-0.246645	low
TCGA-BH-A0DE	>60	Post	Ductal/NST	NA	I+II	Positive	Positive	Negative	79.0667	0	-0.0649764	low
TCGA-BH-A0DG	<60	Pre	Ductal/NST	NA	I+II	Positive	Negative	Negative	68.0333	0	0.145404	low
TCGA-BH-A0DH	>60	Post	Ductal/NST	NA	I+II	Positive	Positive	Negative	38.5333	0	-0.00169281	low
TCGA-BH-A0DI	>60	Post	Ductal/NST	NA	I+II	Positive	Positive	Negative	30.4	0	0.0453701	low
TCGA-BH-A0DK	<60	Pre	Ductal/NST	NA	I+II	Positive	Positive	Negative	14.1	0	-0.111266	low
TCGA-BH-A0DL	>60	Post	Other	NA	I+II	Positive	Negative	Negative	79.3667	0	-0.229498	low
TCGA-BH-A0DO	>60	Post	Ductal/NST	NA	I+II	Positive	Positive	Negative	54.8	0	0.470932	high
TCGA-BH-A0DP	<60	Post	Other	NA	I+II	Positive	Positive	Negative	15.8667	0	0.121496	low
TCGA-BH-A0DQ	<60	Pre	Ductal/NST	NA	I+II	Positive	Positive	Negative	3.26667	0	0.142743	low
TCGA-BH-A0DS	>60	Post	Ductal/NST	NA	III+IV	Positive	Positive	Negative	2.6	0	0.35517	high
TCGA-BH-A0DT	<60	Pre	Ductal/NST	NA	I+II	Positive	Positive	Negative	80.1	0	-0.0630556	low
TCGA-BH-A0DV	<60	Pre	Ductal/NST	NA	III+IV	Positive	Positive	Negative	68.8	0	0.413188	high
TCGA-BH-A0DX	>60	Post	Ductal/NST	NA	I+II	Positive	Positive	Negative	71.8667	0	0.400196	high
TCGA-BH-A0DZ	<60	Pre	Ductal/NST	NA	I+II	Positive	Positive	Positive	16.5	0	-0.792126	low
TCGA-BH-A0E0	<60	Pre	Ductal/NST	NA	III+IV	Negative	Negative	Negative	4.46667	0	0.779396	high
TCGA-BH-A0E1	<60	Pre	Ductal/NST	NA	I+II	Positive	Positive	Negative	15.9	0	-0.0633835	low
TCGA-BH-A0E2	<60	Pre	Ductal/NST	NA	III+IV	Positive	Positive	Negative	14.5	0	-0.2063	low
TCGA-BH-A0E6	>60	Post	Ductal/NST	NA	I+II	Negative	Negative	Negative	9.76667	0	-0.6949	low
TCGA-BH-A0E7	>60	Post	Ductal/NST	NA	I+II	Positive	Positive	Negative	45.4333	0	0.326706	high
TCGA-BH-A0E9	<60	Post	Other	NA	I+II	Positive	Positive	Negative	82.9667	0	0.476028	high
TCGA-BH-A0EA	>60	Post	Ductal/NST	NA	I+II	Positive	Positive	Negative	33.0333	1	0.0454409	low
TCGA-BH-A0EB	>60	Post	Ductal/NST	NA	I+II	Positive	Positive	Negative	24.8333	0	-0.125996	low
TCGA-BH-A0EE	>60	Post	Ductal/NST	NA	I+II	Negative	Negative	Positive	31.4333	0	-0.537838	low
TCGA-BH-A0EI	<60	Pre	Ductal/NST	NA	I+II	Positive	Positive	Negative	64.2	0	0.207372	high
TCGA-BH-A0GY	>60	Post	Ductal/NST	NA	I+II	Positive	Positive	Negative	30.7667	0	0.399394	high
TCGA-BH-A0GZ	>60	Post	Ductal/NST	NA	I+II	Positive	Positive	Negative	10.9333	0	0.0782804	low
TCGA-BH-A0H0	>60	Post	Ductal/NST	NA	I+II	Positive	Positive	Negative	15.3667	0	0.21154	high
TCGA-BH-A0H3	<60	Pre	Ductal/NST	NA	I+II	Positive	Positive	NA	64.2667	0	0.395853	high
TCGA-BH-A0H5	<60	Post	Ductal/NST	NA	I+II	Positive	Positive	NA	54	0	-0.562641	low
TCGA-BH-A0H6	>60	Post	Ductal/NST	NA	I+II	Positive	Positive	Negative	24.9	0	-0.264048	low
TCGA-BH-A0H7	>60	Post	Ductal/NST	NA	III+IV	Positive	Positive	Negative	23.4	0	-0.00483861	low
TCGA-BH-A0H9	>60	Post	Ductal/NST	NA	I+II	Positive	Positive	Negative	41.5667	0	-0.0276945	low
TCGA-BH-A0HA	<60	Pre	Ductal/NST	NA	I+II	Positive	Positive	NA	53.7	0	-0.624188	low
TCGA-BH-A0HB	<60	Post	Ductal/NST	NA	I+II	Positive	Positive	Negative	26.8667	0	-0.486307	low
TCGA-BH-A0HF	>60	Post	Ductal/NST	NA	I+II	Positive	Positive	Negative	24.2333	0	0.0316853	low
TCGA-BH-A0HI	>60	Post	Ductal/NST	NA	I+II	Positive	Positive	Negative	20.6667	0	-0.0399488	low
TCGA-BH-A0HK	>60	Post	Ductal/NST	NA	I+II	Positive	Negative	Negative	5.93333	0	-0.243222	low
TCGA-BH-A0HL	<60	Post	Ductal/NST	NA	I+II	Positive	Positive	Negative	2.4	0	0.782938	high
TCGA-BH-A0HN	>60	Post	Ductal/NST	NA	I+II	Positive	Positive	Negative	17.2	0	-0.334552	low
TCGA-BH-A0HO	<60	Pre	Ductal/NST	NA	I+II	Positive	Positive	Negative	2.53333	0	0.0787362	low
TCGA-BH-A0HP	>60	Post	Other	NA	III+IV	Positive	Negative	Negative	13.8	0	0.135294	low
TCGA-BH-A0HQ	<60	Post	Ductal/NST	NA	I+II	Positive	Positive	Negative	37.3667	0	0.0708556	low
TCGA-BH-A0HU	<60	Pre	Ductal/NST	NA	I+II	Positive	Positive	Negative	13.0667	0	0.0608575	low
TCGA-BH-A0HW	>60	Post	Ductal/NST	NA	I+II	Positive	Negative	Negative	52.0333	0	-0.126756	low
TCGA-BH-A0HX	<60	Post	Ductal/NST	NA	I+II	Positive	Positive	Negative	27.6333	0	0.196062	high
TCGA-BH-A0HY	<60	Post	Ductal/NST	NA	I+II	Positive	Negative	Positive	51.5	0	0.296076	high
TCGA-BH-A0RX	<60	Post	Ductal/NST	NA	I+II	Negative	Negative	Negative	5.66667	0	-0.568657	low
TCGA-BH-A0W3	<60	Pre	Ductal/NST	NA	I+II	Positive	Positive	NA	24.2667	0	0.0076683	low
TCGA-BH-A0W4	<60	Pre	Ductal/NST	NA	I+II	Positive	Positive	Negative	25.3	0	-0.00680213	low
TCGA-BH-A0W5	>60	Pre	Ductal/NST	NA	I+II	Positive	Positive	NA	42.9333	0	-0.185711	low
TCGA-BH-A0W7	<60	Pre	Ductal/NST	NA	I+II	Positive	Positive	Negative	45.4333	0	-0.333026	low
TCGA-BH-A0WA	>60	Pre	Other	NA	I+II	Negative	Negative	Negative	23.3667	0	0.353796	high
TCGA-BH-A18F	<60	Pre	Ductal/NST	NA	I+II	Positive	Positive	Negative	33.3667	0	0.0957123	low
TCGA-BH-A18G	>60	Post	Ductal/NST	NA	I+II	Negative	Negative	Negative	4.96667	0	-0.0730303	low
TCGA-BH-A18H	>60	Post	Ductal/NST	NA	I+II	Positive	Positive	Positive	21.7333	0	-0.632163	low
TCGA-BH-A18I	<60	Post	Ductal/NST	NA	I+II	Positive	Positive	Positive	36.4333	0	-0.273723	low
TCGA-BH-A18J	<60	Pre	Ductal/NST	NA	III+IV	Positive	Positive	Negative	20.4	1	0.650803	high
TCGA-BH-A18K	<60	Pre	Ductal/NST	NA	I+II	Positive	Positive	Negative	92.1	1	0.0463842	low
TCGA-BH-A18L	<60	Pre	Ductal/NST	NA	III+IV	Positive	Positive	Negative	27.0333	1	0.0806969	low
TCGA-BH-A18M	<60	Pre	Ductal/NST	NA	III+IV	Positive	Positive	Positive	73.5667	1	0.252907	high
TCGA-BH-A18N	>60	Pre	Ductal/NST	NA	I+II	Positive	Positive	Negative	38.2667	1	0.316575	high
TCGA-BH-A18P	<60	Pre	Ductal/NST	NA	I+II	Positive	Negative	Positive	30.7	1	-0.227031	low
TCGA-BH-A18Q	<60	Pre	Ductal/NST	NA	I+II	Negative	Negative	Positive	56.4	1	-0.330767	low
TCGA-BH-A18S	>60	Post	Other	NA	I+II	Positive	Positive	Negative	66.9667	1	0.456457	high
TCGA-BH-A18T	>60	Post	Ductal/NST	NA	I+II	Negative	Negative	Positive	7.46667	1	0.235082	high
TCGA-BH-A18U	>60	Post	Ductal/NST	NA	III+IV	Positive	Positive	Positive	52.1	1	-0.171898	low
TCGA-BH-A18V	<60	Pre	Ductal/NST	NA	I+II	Negative	Negative	Negative	51.8667	1	0.0790726	low
TCGA-BH-A1EN	>60	Post	Ductal/NST	NA	I+II	Negative	Negative	Positive	70.9	1	0.804615	high
TCGA-BH-A1EO	>60	Post	Other	NA	I+II	Positive	Positive	Negative	93.2667	1	1.01378	high
TCGA-BH-A1ES	<60	Pre	Ductal/NST	NA	I+II	Positive	Positive	Negative	115.4	1	0.270001	high
TCGA-BH-A1ET	<60	Pre	Ductal/NST	NA	I+II	Positive	Positive	Negative	84	1	-0.230369	low
TCGA-BH-A1EU	>60	Post	Ductal/NST	NA	I+II	Positive	Positive	Negative	42.8667	1	0.149503	low
TCGA-BH-A1EV	<60	Pre	Ductal/NST	NA	III+IV	Positive	Positive	Positive	12.1667	1	0.786996	high
TCGA-BH-A1EW	<60	Pre	Ductal/NST	NA	I+II	Negative	Negative	Negative	56.4667	1	0.0920094	low
TCGA-BH-A1EX	>60	Post	Ductal/NST	NA	I+II	Positive	Positive	Positive	50.2667	1	0.459956	high
TCGA-BH-A1EY	>60	Post	Ductal/NST	NA	I+II	Positive	Positive	Negative	17.9333	1	0.1355	low
TCGA-BH-A1F2	<60	Pre	Ductal/NST	NA	III+IV	Positive	Positive	Positive	31.9667	1	0.861701	high
TCGA-BH-A1F5	>60	Pre	Ductal/NST	NA	I+II	Positive	Positive	Negative	90.4	1	0.252774	high
TCGA-BH-A1F8	>60	Post	Ductal/NST	NA	III+IV	Positive	Positive	Positive	25.4333	1	0.355551	high
TCGA-BH-A1FB	<60	Post	Ductal/NST	NA	I+II	Positive	Positive	Negative	122.3	1	-0.157748	low
TCGA-BH-A1FC	>60	Post	Other	NA	I+II	Negative	Negative	Negative	115.733	1	-0.701954	low
TCGA-BH-A1FD	>60	Post	Ductal/NST	NA	I+II	Positive	Positive	Negative	33.6333	1	0.391742	high
TCGA-BH-A1FE	<60	Pre	Ductal/NST	NA	I+II	Positive	Positive	NA	75.7667	1	-0.0588037	low
TCGA-BH-A1FG	>60	Post	Ductal/NST	NA	I+II	Positive	Positive	Negative	124.533	1	0.102498	low
TCGA-BH-A1FH	<60	Pre	Ductal/NST	NA	III+IV	Positive	Negative	NA	34.4667	1	-0.208944	low
TCGA-BH-A1FJ	>60	Pre	Ductal/NST	NA	III+IV	Negative	Positive	NA	64.2333	1	0.530173	high
TCGA-BH-A1FL	>60	Pre	Ductal/NST	NA	I+II	Positive	Positive	NA	55.7667	1	0.70847	high
TCGA-BH-A1FM	<60	Pre	Ductal/NST	NA	III+IV	Positive	Negative	NA	46.2667	1	0.371678	high
TCGA-BH-A1FN	<60	Pre	Ductal/NST	NA	I+II	Positive	Positive	NA	73.0667	1	0.540964	high
TCGA-BH-A1FR	>60	Pre	Other	NA	III+IV	Positive	Positive	NA	54.7333	1	0.0719566	low
TCGA-BH-A201	>60	Post	Ductal/NST	NA	I+II	Positive	Positive	Negative	28.5333	0	0.322659	high
TCGA-BH-A202	<60	Post	Ductal/NST	NA	I+II	Positive	Positive	Positive	26.5	0	-0.22299	low
TCGA-BH-A203	>60	Post	Ductal/NST	NA	I+II	NA	NA	NA	39.1333	1	0.119431	low
TCGA-BH-A204	>60	Post	Ductal/NST	NA	I+II	NA	NA	NA	84.4667	1	0.647264	high
TCGA-BH-A209	>60	Post	Other	NA	I+II	Positive	Positive	NA	131.967	1	-0.477774	low
TCGA-BH-A28Q	<60	Pre	Other	NA	I+II	Positive	Positive	Negative	37.3	0	0.163118	low
TCGA-BH-A2L8	<60	Pre	Other	NA	I+II	Positive	Positive	Negative	20.4	0	-0.46862	low
TCGA-BH-A42T	>60	Post	Other	NA	I+II	Positive	Positive	Positive	10.6667	1	0.382175	high
TCGA-BH-A42V	<60	Pre	Ductal/NST	NA	I+II	Positive	Positive	Negative	21.1667	0	-0.0488852	low
TCGA-BH-A5IZ	<60	Post	Ductal/NST	NA	I+II	Positive	Negative	Negative	18.9	0	0.568156	high
TCGA-BH-A5J0	>60	Post	Ductal/NST	NA	I+II	Positive	Positive	Negative	23.8333	0	-0.206945	low
TCGA-BH-A6R8	<60	Pre	Ductal/NST	NA	I+II	Positive	Positive	NA	9.76667	0	-0.724354	low
TCGA-BH-A8FY	>60	Post	Other	NA	I+II	Positive	Positive	Negative	9.83333	1	0.178539	high
TCGA-BH-A8G0	<60	Pre	Other	NA	I+II	Positive	Positive	Negative	22.0667	0	-0.164208	low
TCGA-BH-AB28	<60	Pre	Other	NA	III+IV	Positive	Positive	Negative	9.56667	0	-0.461663	low
TCGA-C8-A12L	>60	Post	Ductal/NST	NA	I+II	Negative	Negative	Negative	12.1	0	0.703701	high
TCGA-C8-A12M	>60	Post	Ductal/NST	NA	I+II	Positive	Negative	Negative	11.9333	0	-0.570409	low
TCGA-C8-A12N	<60	Post	Ductal/NST	NA	I+II	Positive	Positive	Negative	11.9333	0	0.00432984	low
TCGA-C8-A12O	<60	Pre	Ductal/NST	NA	I+II	Positive	Positive	Negative	12.8333	0	0.165368	low
TCGA-C8-A12P	<60	Post	Ductal/NST	NA	I+II	Negative	Negative	Positive	11.9333	0	0.488429	high
TCGA-C8-A12Q	>60	Post	Ductal/NST	NA	III+IV	Negative	Negative	Positive	12.8333	1	0.962996	high
TCGA-C8-A12U	<60	Pre	Ductal/NST	NA	I+II	Positive	Positive	Negative	12.8333	0	-0.926008	low
TCGA-C8-A12V	<60	Post	Ductal/NST	NA	I+II	Negative	Negative	Negative	12.8333	0	-0.332565	low
TCGA-C8-A12W	<60	Pre	Ductal/NST	NA	III+IV	Positive	Positive	Negative	12.8333	0	0.54182	high
TCGA-C8-A12X	>60	Post	Other	NA	I+II	Positive	Positive	Negative	12.8333	0	-0.288297	low
TCGA-C8-A12Y	<60	Pre	Ductal/NST	NA	I+II	NA	NA	NA	49.2	0	-0.588451	low
TCGA-C8-A12Z	<60	Pre	Ductal/NST	NA	I+II	Negative	Negative	Positive	12.7333	0	0.34521	high
TCGA-C8-A130	<60	Pre	Ductal/NST	NA	III+IV	Positive	Positive	Negative	12.3333	0	0.074947	low
TCGA-C8-A131	>60	Post	Ductal/NST	NA	III+IV	Negative	Negative	Negative	13.7	0	0.408228	high
TCGA-C8-A132	<60	Post	Ductal/NST	NA	I+II	Positive	Positive	NA	12.7667	0	-0.255468	low
TCGA-C8-A134	<60	Pre	Ductal/NST	NA	I+II	Negative	Negative	Negative	12.7667	0	0.172796	high
TCGA-C8-A135	>60	Post	Ductal/NST	NA	I+II	Negative	Negative	Positive	13.1	0	0.220817	high
TCGA-C8-A137	<60	Pre	Ductal/NST	NA	I+II	Negative	Negative	Positive	12.6333	0	0.217665	high
TCGA-C8-A138	<60	Post	Ductal/NST	NA	III+IV	Positive	Negative	Negative	12.6667	0	-0.756334	low
TCGA-C8-A1HE	<60	Post	Ductal/NST	NA	I+II	Positive	Positive	Negative	12.5	0	0.450587	high
TCGA-C8-A1HG	<60	Pre	Ductal/NST	NA	I+II	Positive	Positive	Negative	11.5	0	-0.740613	low
TCGA-C8-A1HI	<60	Pre	Ductal/NST	NA	III+IV	Positive	Positive	Negative	11.4333	0	0.0855178	low
TCGA-C8-A1HK	<60	Pre	Ductal/NST	NA	I+II	Negative	Negative	Positive	12.2	0	0.108317	low
TCGA-C8-A1HL	<60	Pre	Other	NA	III+IV	Positive	Negative	Negative	10.5667	0	0.233402	high
TCGA-C8-A1HM	>60	Post	Ductal/NST	NA	I+II	Positive	Positive	Negative	12.5	0	-0.188482	low
TCGA-C8-A1HN	<60	Post	Ductal/NST	NA	I+II	Positive	Positive	Negative	13.1333	0	0.60403	high
TCGA-C8-A1HO	<60	Pre	Ductal/NST	NA	III+IV	Positive	Positive	Negative	12.5	0	-0.424225	low
TCGA-C8-A26V	<60	Pre	Ductal/NST	NA	III+IV	Positive	Positive	Negative	20.5333	0	-0.407293	low
TCGA-C8-A26W	<60	Post	Ductal/NST	NA	I+II	Positive	Positive	Negative	12.7	0	-0.0718442	low
TCGA-C8-A26X	<60	Post	Ductal/NST	NA	I+II	Negative	Negative	Negative	12.5333	0	-0.23635	low
TCGA-C8-A26Y	>60	Post	Ductal/NST	NA	I+II	Negative	Negative	Negative	13.1333	0	0.423814	high
TCGA-C8-A26Z	<60	Post	Ductal/NST	NA	I+II	Positive	Positive	Negative	15.6667	0	0.232388	high
TCGA-C8-A273	<60	Pre	Ductal/NST	NA	I+II	Positive	Positive	Negative	17.1	0	0.263902	high
TCGA-C8-A274	>60	Post	Ductal/NST	NA	I+II	Positive	Positive	Negative	16.9333	0	0.223207	high
TCGA-C8-A278	>60	Post	Ductal/NST	NA	III+IV	Negative	Negative	Positive	9.9	0	0.0220091	low
TCGA-C8-A27A	<60	Pre	Ductal/NST	NA	I+II	Positive	Positive	Negative	24.9	0	-0.428185	low
TCGA-C8-A27B	<60	Pre	Ductal/NST	NA	I+II	Negative	Negative	Negative	14.6333	0	0.185794	high
TCGA-C8-A3M7	<60	Post	Other	NA	III+IV	Negative	Negative	Negative	34.4667	1	-0.224029	low
TCGA-C8-A3M8	>60	Post	Other	NA	I+II	Positive	Positive	Positive	13.1333	0	0.0698422	low
TCGA-C8-A8HP	<60	Post	Other	NA	III+IV	Negative	Negative	Positive	13.2	0	-0.39706	low
TCGA-C8-A8HQ	<60	Post	Other	NA	I+II	Positive	Positive	Negative	12.6667	0	-0.382781	low
TCGA-D8-A13Y	<60	Post	Ductal/NST	NA	I+II	Positive	Positive	Negative	57.6	0	0.706454	high
TCGA-D8-A140	>60	Post	Ductal/NST	NA	I+II	Positive	Positive	Positive	13.4333	0	0.0575952	low
TCGA-D8-A142	>60	Post	Ductal/NST	NA	I+II	Negative	Negative	Negative	14.1667	0	0.268125	high
TCGA-D8-A143	<60	Post	Ductal/NST	NA	I+II	Negative	Negative	Negative	14.3667	0	-0.0784713	low
TCGA-D8-A145	>60	Post	Ductal/NST	NA	I+II	Positive	Positive	Negative	13.6667	0	0.0816158	low
TCGA-D8-A146	<60	Post	Ductal/NST	NA	I+II	Positive	Positive	Negative	21.4333	0	-0.250526	low
TCGA-D8-A1J8	>60	Post	Ductal/NST	NA	I+II	Positive	Positive	Negative	14.3667	0	-0.0787467	low
TCGA-D8-A1J9	<60	Post	Ductal/NST	NA	I+II	Positive	Negative	Positive	17.7333	0	0.855412	high
TCGA-D8-A1JB	<60	Post	Ductal/NST	NA	I+II	Positive	Positive	Negative	56.2667	0	-0.337799	low
TCGA-D8-A1JC	<60	Post	Ductal/NST	NA	III+IV	Positive	Positive	Negative	16	0	-0.0418644	low
TCGA-D8-A1JD	<60	Pre	Ductal/NST	NA	I+II	Positive	Positive	Negative	18.4	0	0.340704	high
TCGA-D8-A1JE	>60	Post	Ductal/NST	NA	I+II	Positive	Positive	Negative	19.1667	0	0.296077	high
TCGA-D8-A1JF	>60	Post	Ductal/NST	NA	III+IV	Negative	Negative	Negative	12.2	0	0.673786	high
TCGA-D8-A1JG	>60	Post	Ductal/NST	NA	I+II	Negative	Negative	Negative	53.7333	0	0.0832075	low
TCGA-D8-A1JH	<60	Post	Ductal/NST	NA	I+II	Positive	Positive	Negative	14.2	0	0.247192	high
TCGA-D8-A1JI	<60	Post	Ductal/NST	NA	I+II	Positive	Positive	Negative	19.2333	0	-0.29515	low
TCGA-D8-A1JJ	<60	Post	Ductal/NST	NA	I+II	Positive	Positive	Negative	20.3667	0	0.559677	high
TCGA-D8-A1JK	>60	Post	Ductal/NST	NA	I+II	Negative	Positive	Negative	20.4	0	-0.435118	low
TCGA-D8-A1JL	>60	Post	Ductal/NST	NA	I+II	Negative	Negative	Negative	20.3667	0	0.0230883	low
TCGA-D8-A1JM	<60	Post	Ductal/NST	NA	I+II	Positive	Negative	Negative	19.6667	0	-0.261602	low
TCGA-D8-A1JN	>60	Post	Other	NA	III+IV	Positive	Positive	NA	20.6667	0	-0.155981	low
TCGA-D8-A1JP	>60	Post	Ductal/NST	NA	I+II	Positive	Positive	Negative	21.3	0	0.602086	high
TCGA-D8-A1JS	>60	Post	Other	NA	I+II	Positive	Positive	Negative	12.3667	0	0.00220494	low
TCGA-D8-A1JT	>60	Post	Other	NA	I+II	Positive	Positive	Negative	13.5	0	0.0295264	low
TCGA-D8-A1JU	<60	Post	Ductal/NST	NA	I+II	Positive	Positive	Negative	14.9	0	0.0337276	low
TCGA-D8-A1X5	>60	Post	Ductal/NST	NA	III+IV	Positive	Positive	Positive	18.8333	0	0.293062	high
TCGA-D8-A1X6	>60	Post	Ductal/NST	NA	III+IV	Positive	Positive	Negative	18.0333	0	0.260889	high
TCGA-D8-A1X7	<60	Pre	Other	NA	I+II	Positive	Positive	Negative	16.9667	0	0.358462	high
TCGA-D8-A1X9	>60	Post	Ductal/NST	NA	I+II	Positive	Positive	NA	24.2333	0	0.111017	low
TCGA-D8-A1XA	>60	Post	Ductal/NST	NA	I+II	Positive	Positive	Negative	27.9667	0	-0.292098	low
TCGA-D8-A1XB	>60	Post	Ductal/NST	NA	I+II	Positive	Positive	Negative	18.4	0	0.274208	high
TCGA-D8-A1XC	>60	Post	Other	NA	III+IV	Positive	Positive	Negative	12.5667	1	0.337269	high
TCGA-D8-A1XD	<60	Pre	Ductal/NST	NA	III+IV	Positive	Positive	Negative	17.4	0	0.184884	high
TCGA-D8-A1XF	<60	Pre	Ductal/NST	NA	I+II	Positive	Positive	Negative	15.4333	0	-0.159448	low
TCGA-D8-A1XG	>60	Post	Ductal/NST	NA	III+IV	Positive	Negative	Negative	14.9333	0	0.486782	high
TCGA-D8-A1XJ	>60	Post	Other	NA	III+IV	Positive	Positive	Positive	22.1333	0	0.95443	high
TCGA-D8-A1XK	<60	Post	Ductal/NST	NA	I+II	Negative	Negative	Negative	14.7	0	0.511109	high
TCGA-D8-A1XL	<60	Pre	Ductal/NST	NA	I+II	Positive	Positive	Negative	20.2	0	-0.489846	low
TCGA-D8-A1XM	<60	Post	Ductal/NST	NA	I+II	Positive	Positive	Negative	17.9333	0	0.115825	low
TCGA-D8-A1XO	<60	Post	Other	NA	I+II	Positive	Positive	Negative	56.0667	0	0.582689	high
TCGA-D8-A1XQ	>60	Post	Ductal/NST	NA	I+II	Negative	Negative	Negative	16.6333	0	-0.101101	low
TCGA-D8-A1XR	<60	Post	Ductal/NST	NA	I+II	Positive	Positive	Negative	16.0667	0	0.364915	high
TCGA-D8-A1XS	<60	Pre	Other	NA	NA	Positive	Positive	Positive	16.5333	0	-0.0563782	low
TCGA-D8-A1XT	>60	Post	Ductal/NST	NA	I+II	Negative	Negative	Positive	16.8667	0	0.050415	low
TCGA-D8-A1XU	<60	Post	Ductal/NST	NA	I+II	Positive	Positive	Negative	13.1667	0	0.431215	high
TCGA-D8-A1XV	>60	Post	Other	NA	I+II	Positive	Positive	Negative	15.3667	0	-0.0775875	low
TCGA-D8-A1XY	>60	Post	Ductal/NST	NA	I+II	Positive	Positive	Positive	16.7667	0	0.01177	low
TCGA-D8-A1XZ	>60	Post	Ductal/NST	NA	III+IV	Positive	Negative	Negative	15.5333	0	-0.310828	low
TCGA-D8-A1Y0	>60	Post	Ductal/NST	NA	III+IV	Positive	Positive	Negative	15.7333	0	-0.239373	low
TCGA-D8-A1Y1	>60	Post	Ductal/NST	NA	III+IV	Positive	Positive	Negative	10.0667	1	0.505561	high
TCGA-D8-A1Y2	>60	Post	Ductal/NST	NA	I+II	Positive	Positive	Negative	14.4333	0	-0.0130858	low
TCGA-D8-A1Y3	>60	Post	Ductal/NST	NA	III+IV	Positive	Positive	Negative	14.3333	0	-0.154426	low
TCGA-D8-A27E	>60	Post	Other	NA	I+II	Positive	Positive	Negative	17.6667	0	0.0552947	low
TCGA-D8-A27F	<60	Pre	Ductal/NST	NA	I+II	Negative	Negative	Negative	16.2667	0	0.600766	high
TCGA-D8-A27G	>60	Post	Other	NA	I+II	Positive	Positive	Negative	13.6333	0	-0.0958081	low
TCGA-D8-A27H	>60	Post	Ductal/NST	NA	I+II	Negative	Negative	Negative	13.2333	0	0.439064	high
TCGA-D8-A27I	<60	Post	Other	NA	III+IV	Positive	Positive	Negative	14.6333	0	0.0500755	low
TCGA-D8-A27K	<60	Post	Ductal/NST	NA	I+II	Positive	Positive	Negative	48.7	0	-0.0960174	low
TCGA-D8-A27L	<60	Post	Ductal/NST	NA	III+IV	Positive	Positive	Negative	16.6333	0	0.0828212	low
TCGA-D8-A27M	<60	Post	Ductal/NST	NA	I+II	Negative	Negative	Negative	13.6667	0	-0.108944	low
TCGA-D8-A27N	<60	Pre	Ductal/NST	NA	III+IV	Positive	Positive	Positive	17.3	0	0.370161	high
TCGA-D8-A27P	>60	Post	Ductal/NST	NA	I+II	Positive	Positive	Negative	1.63333	0	-0.0343343	low
TCGA-D8-A27R	<60	Post	Ductal/NST	NA	III+IV	Positive	Positive	Negative	10.2333	0	0.299671	high
TCGA-D8-A27T	<60	Post	Other	NA	III+IV	Positive	Positive	Negative	13.2667	0	0.0396504	low
TCGA-D8-A27V	>60	Post	Other	NA	I+II	Positive	Positive	Negative	12.7	0	0.00782389	low
TCGA-D8-A27W	<60	Post	Other	NA	III+IV	Positive	Positive	Negative	12.4333	0	0.0555896	low
TCGA-D8-A3Z5	<60	Post	Other	NA	III+IV	Positive	Positive	Negative	33.8333	0	-0.313822	low
TCGA-D8-A3Z6	<60	Post	Other	NA	III+IV	Positive	Positive	Negative	18.7667	0	0.0779425	low
TCGA-D8-A4Z1	>60	Post	Other	NA	I+II	Positive	Positive	Negative	21.9667	0	-0.0593875	low
TCGA-D8-A73U	>60	Post	Other	NA	I+II	Positive	Positive	Negative	16.4	0	-0.315558	low
TCGA-D8-A73W	>60	Post	Other	NA	III+IV	Positive	Negative	Negative	12.8333	1	0.392353	high
TCGA-D8-A73X	<60	Post	Other	NA	I+II	Positive	Positive	Negative	25.5667	0	-0.117459	low
TCGA-E2-A105	>60	Post	Ductal/NST	NA	I+II	Positive	Positive	Negative	43.6	0	-0.0414338	low
TCGA-E2-A106	<60	Pre	Ductal/NST	NA	I+II	Positive	Positive	Negative	84.7	0	-0.0249398	low
TCGA-E2-A107	<60	Post	Other	NA	III+IV	Positive	Negative	Negative	34.9	0	0.250057	high
TCGA-E2-A109	>60	Post	Ductal/NST	NA	I+II	Positive	Negative	Negative	47.2333	0	-0.183578	low
TCGA-E2-A10A	<60	Pre	Ductal/NST	NA	I+II	Positive	Positive	Positive	40.9667	0	0.240272	high
TCGA-E2-A10B	>60	Post	Ductal/NST	NA	I+II	Positive	Positive	Negative	38.0333	0	0.49759	high
TCGA-E2-A10C	<60	Post	Ductal/NST	NA	I+II	Positive	Positive	Negative	40.6667	0	-0.195572	low
TCGA-E2-A10E	>60	Post	Ductal/NST	NA	I+II	Positive	Positive	Negative	28.8333	0	-0.00794861	low
TCGA-E2-A10F	<60	Pre	Other	NA	I+II	Positive	Positive	Negative	29.2667	0	0.119482	low
TCGA-E2-A14N	<60	Pre	Ductal/NST	NA	I+II	Negative	Negative	Negative	47.8	0	-0.271309	low
TCGA-E2-A14O	>60	Post	Ductal/NST	NA	III+IV	Positive	Positive	Negative	45.3	0	0.133479	low
TCGA-E2-A14P	>60	Post	Ductal/NST	NA	III+IV	Negative	Negative	Positive	41.5333	0	0.155489	low
TCGA-E2-A14Q	<60	Pre	Ductal/NST	NA	I+II	Positive	Positive	Negative	38.7667	0	0.0227227	low
TCGA-E2-A14R	>60	Post	Ductal/NST	NA	I+II	Negative	Negative	Negative	39.1333	0	-0.50509	low
TCGA-E2-A14T	<60	Post	Ductal/NST	NA	I+II	Positive	Positive	Negative	77.0333	0	-0.142667	low
TCGA-E2-A14U	>60	Post	Other	NA	I+II	Positive	Positive	Negative	43.9333	0	0.227314	high
TCGA-E2-A14V	<60	Post	Ductal/NST	NA	I+II	Positive	Positive	Positive	34.7333	0	0.349193	high
TCGA-E2-A14W	>60	Pre	Ductal/NST	NA	NA	Positive	Positive	NA	32.4667	0	0.742896	high
TCGA-E2-A14X	<60	Post	Ductal/NST	NA	III+IV	Negative	Negative	Negative	32.4	0	-0.0987586	low
TCGA-E2-A14Y	<60	Pre	Ductal/NST	NA	I+II	Positive	Positive	Negative	70.3	0	-0.289656	low
TCGA-E2-A14Z	>60	Post	Ductal/NST	NA	I+II	Positive	Positive	Negative	18.7667	1	-0.185405	low
TCGA-E2-A150	<60	Post	Ductal/NST	NA	I+II	Negative	Negative	Negative	64.5	0	0.416698	high
TCGA-E2-A152	<60	Post	Ductal/NST	NA	I+II	Positive	Negative	Positive	70.9333	0	0.803658	high
TCGA-E2-A153	<60	Pre	Ductal/NST	NA	I+II	Positive	Positive	Negative	23.5667	0	0.27708	high
TCGA-E2-A154	>60	Post	Ductal/NST	NA	I+II	Positive	Positive	Negative	19.7	0	0.44326	high
TCGA-E2-A155	<60	Post	Ductal/NST	NA	I+II	Positive	Negative	Negative	21.3333	0	0.34509	high
TCGA-E2-A156	>60	Post	Ductal/NST	NA	I+II	Positive	Positive	Negative	24.2	0	0.191148	high
TCGA-E2-A158	<60	Pre	Ductal/NST	NA	I+II	Negative	Negative	Negative	15	0	0.174879	high
TCGA-E2-A159	<60	Pre	Ductal/NST	NA	I+II	Negative	Negative	NA	25.4	0	0.15297	low
TCGA-E2-A15A	<60	Pre	Ductal/NST	NA	III+IV	Positive	Positive	Negative	23.6667	0	0.0610624	low
TCGA-E2-A15C	>60	Post	Ductal/NST	NA	I+II	Positive	Positive	Negative	23.1333	0	0.00105289	low
TCGA-E2-A15D	<60	Pre	Ductal/NST	NA	I+II	Positive	Positive	Negative	17.5333	0	0.0617872	low
TCGA-E2-A15E	<60	Pre	Ductal/NST	NA	I+II	Positive	Positive	NA	21	0	0.0797081	low
TCGA-E2-A15F	>60	Post	Ductal/NST	NA	I+II	Positive	Positive	Negative	21.9333	0	0.489712	high
TCGA-E2-A15G	>60	Post	Other	NA	I+II	Positive	Positive	Negative	18.4667	0	0.465171	high
TCGA-E2-A15H	<60	Pre	Ductal/NST	NA	I+II	Positive	Positive	Negative	13.1	0	-0.172103	low
TCGA-E2-A15I	<60	Pre	Ductal/NST	NA	I+II	Positive	Positive	Negative	56.4	0	-0.667582	low
TCGA-E2-A15J	<60	Pre	Ductal/NST	NA	I+II	Positive	Positive	Negative	54.6667	0	-0.18809	low
TCGA-E2-A15K	<60	Post	Ductal/NST	NA	I+II	Positive	Positive	Negative	9.16667	0	-0.220837	low
TCGA-E2-A15L	>60	Post	Other	NA	I+II	Positive	Positive	Negative	20.8667	0	0.359859	high
TCGA-E2-A15M	>60	Post	Other	NA	I+II	Positive	Positive	Negative	11.2	1	0.475445	high
TCGA-E2-A15O	>60	Post	Ductal/NST	NA	I+II	Positive	Positive	Negative	51.5	0	0.213712	high
TCGA-E2-A15P	>60	Post	Ductal/NST	NA	I+II	Positive	Positive	Negative	19.8333	0	0.0323441	low
TCGA-E2-A15R	>60	Post	Ductal/NST	NA	I+II	Positive	Positive	Negative	57.7333	0	-0.390555	low
TCGA-E2-A15S	<60	Post	Ductal/NST	NA	I+II	Positive	Negative	Negative	14.2667	0	0.22586	high
TCGA-E2-A15T	>60	Post	Ductal/NST	NA	I+II	Positive	Positive	Negative	52.1	0	0.249335	high
TCGA-E2-A1AZ	>60	Post	Ductal/NST	NA	I+II	Negative	Negative	NA	77.6333	0	-0.0317986	low
TCGA-E2-A1B0	<60	Post	Ductal/NST	NA	III+IV	Negative	Negative	Positive	54.3667	0	0.175983	high
TCGA-E2-A1B1	<60	Post	Ductal/NST	NA	I+II	Positive	Positive	Negative	88.4333	0	0.14949	low
TCGA-E2-A1B4	>60	Post	Ductal/NST	NA	III+IV	Positive	Positive	Negative	33.4667	1	-0.153215	low
TCGA-E2-A1B5	<60	Pre	Other	NA	I+II	Positive	Positive	Negative	32.8	0	-0.143371	low
TCGA-E2-A1B6	<60	Pre	Ductal/NST	NA	I+II	Negative	Negative	Negative	28.9	0	-0.201627	low
TCGA-E2-A1BC	>60	Post	Ductal/NST	NA	I+II	Positive	Positive	Negative	16.7	0	0.263858	high
TCGA-E2-A1BD	<60	Post	Ductal/NST	NA	I+II	Positive	Positive	Negative	37.7667	0	0.0601622	low
TCGA-E2-A1IE	>60	Post	Ductal/NST	NA	I+II	Positive	Positive	Negative	78.7333	0	-0.223295	low
TCGA-E2-A1IF	>60	Post	Ductal/NST	NA	I+II	Positive	Positive	Negative	37.9333	0	0.516009	high
TCGA-E2-A1IG	<60	Pre	Ductal/NST	NA	I+II	Positive	Positive	Negative	71.3333	0	0.192925	high
TCGA-E2-A1IH	>60	Post	Other	NA	I+II	Positive	Positive	Negative	34.2	0	0.322569	high
TCGA-E2-A1II	<60	Post	Ductal/NST	NA	I+II	Negative	Positive	Negative	34.1667	0	-0.572279	low
TCGA-E2-A1IJ	<60	Post	Other	NA	I+II	Positive	Positive	Negative	28.8333	0	-0.200371	low
TCGA-E2-A1IK	>60	Post	Ductal/NST	NA	I+II	Positive	Positive	Negative	60	0	-0.0947984	low
TCGA-E2-A1IL	>60	Post	Other	NA	I+II	Positive	Positive	Negative	3.93333	0	-0.0076806	low
TCGA-E2-A1IN	<60	Post	Ductal/NST	NA	I+II	Positive	Positive	Negative	22.5	0	0.423896	high
TCGA-E2-A1IO	<60	Pre	Ductal/NST	NA	I+II	Positive	Positive	Negative	61.8333	0	0.0233359	low
TCGA-E2-A1IU	<60	Post	Ductal/NST	NA	I+II	Positive	Positive	Negative	11.2333	0	-0.415251	low
TCGA-E2-A1L6	<60	Pre	Ductal/NST	NA	I+II	Positive	Positive	Negative	54.9333	0	-0.0655622	low
TCGA-E2-A1L7	<60	Pre	Ductal/NST	NA	III+IV	Negative	Negative	Negative	61.2	0	-0.369853	low
TCGA-E2-A1L8	<60	Post	Other	NA	I+II	Positive	Positive	Negative	74.6667	0	-0.0959661	low
TCGA-E2-A1L9	<60	Pre	Ductal/NST	NA	I+II	Positive	Positive	Negative	19.9333	0	-0.0098513	low
TCGA-E2-A1LA	<60	Post	Ductal/NST	NA	I+II	Positive	Positive	Negative	24.9333	0	-0.957563	low
TCGA-E2-A1LB	<60	Pre	Ductal/NST	NA	I+II	Negative	Negative	Positive	76.8667	0	0.391169	high
TCGA-E2-A1LE	>60	Post	Ductal/NST	NA	III+IV	Negative	Negative	Positive	29.3	1	0.181814	high
TCGA-E2-A1LG	<60	Pre	Other	NA	I+II	Negative	Negative	Negative	50.7667	0	-0.668561	low
TCGA-E2-A1LH	<60	Post	Ductal/NST	NA	I+II	Negative	Negative	Negative	108.233	0	-0.451041	low
TCGA-E2-A1LI	<60	Post	Ductal/NST	NA	I+II	Negative	Negative	NA	104.033	0	0.132399	low
TCGA-E2-A1LK	>60	Post	Ductal/NST	NA	III+IV	Negative	Negative	Negative	8.86667	1	1.36341	high
TCGA-E2-A1LL	>60	Post	Ductal/NST	NA	III+IV	Negative	Negative	Negative	43.6333	0	-0.000731939	low
TCGA-E2-A1LS	<60	Pre	Ductal/NST	NA	I+II	Negative	Negative	Negative	53.4667	0	0.0732413	low
TCGA-E2-A2P5	>60	Post	Other	NA	III+IV	Positive	Positive	NA	27.3667	1	-0.0764333	low
TCGA-E2-A2P6	>60	Post	Other	NA	I+II	Positive	Positive	NA	35.0333	0	-0.247718	low
TCGA-E2-A3DX	<60	Pre	Other	NA	III+IV	Positive	Positive	NA	44.1667	0	-0.0966598	low
TCGA-E2-A56Z	>60	Post	Ductal/NST	NA	I+II	Positive	Positive	Negative	8.4	0	-0.113626	low
TCGA-E2-A570	<60	Pre	Ductal/NST	NA	I+II	Positive	Positive	Negative	31.0333	0	-0.428163	low
TCGA-E2-A572	>60	Post	Ductal/NST	NA	III+IV	Positive	Positive	NA	40.2667	0	-0.40719	low
TCGA-E2-A573	<60	Pre	Ductal/NST	NA	I+II	Negative	Negative	Negative	35.4	0	-0.0465328	low
TCGA-E2-A574	<60	Pre	Ductal/NST	NA	I+II	Negative	Negative	Negative	39.3	0	-0.509335	low
TCGA-E2-A576	>60	Post	Other	NA	I+II	Positive	Positive	Negative	34.7667	0	-0.385032	low
TCGA-E2-A9RU	>60	Post	Ductal/NST	NA	III+IV	Positive	Negative	Negative	17.9333	0	0.227635	high
TCGA-E9-A1N3	>60	Post	Other	NA	III+IV	NA	NA	NA	35.3	0	0.0580266	low
TCGA-E9-A1N4	<60	Pre	Other	NA	III+IV	Positive	Positive	Positive	33.3333	0	-0.0767688	low
TCGA-E9-A1N5	<60	Post	Other	NA	I+II	Positive	Positive	Positive	37.3333	0	-0.268168	low
TCGA-E9-A1N6	<60	Post	Ductal/NST	NA	I+II	Positive	Positive	Positive	22.6	1	0.718725	high
TCGA-E9-A1N8	<60	Post	Ductal/NST	NA	I+II	Negative	NA	Negative	34.6333	0	-0.243939	low
TCGA-E9-A1N9	<60	Post	Other	NA	I+II	Negative	Positive	Positive	36.7	0	-0.175503	low
TCGA-E9-A1NA	<60	Post	Other	NA	I+II	Positive	Positive	Positive	37.0667	0	0.374936	high
TCGA-E9-A1NC	>60	Post	Other	NA	I+II	Negative	Positive	Positive	40.1	0	-0.417213	low
TCGA-E9-A1ND	>60	Post	Ductal/NST	NA	I+II	Negative	Negative	Positive	42.2	0	-0.113484	low
TCGA-E9-A1NE	<60	Pre	Ductal/NST	NA	I+II	Positive	Positive	Negative	36.2667	0	-0.340061	low
TCGA-E9-A1NF	<60	Post	Other	NA	I+II	Positive	Positive	Negative	35.7333	1	-0.100741	low
TCGA-E9-A1NG	>60	Post	Ductal/NST	NA	I+II	Positive	Positive	Negative	26.2	1	0.600113	high
TCGA-E9-A1NH	>60	Post	Ductal/NST	NA	I+II	Positive	Positive	Negative	19.2	0	-0.0729009	low
TCGA-E9-A1NI	<60	Post	Other	NA	I+II	Positive	Positive	Negative	10	0	0.072594	low
TCGA-E9-A1QZ	>60	Post	Ductal/NST	NA	I+II	NA	NA	NA	25.1667	0	-0.154939	low
TCGA-E9-A1R0	<60	Post	Ductal/NST	NA	I+II	NA	NA	NA	28.6667	0	-0.120496	low
TCGA-E9-A1R2	<60	Post	Ductal/NST	NA	III+IV	Positive	Negative	NA	35.4333	0	0.311289	high
TCGA-E9-A1R3	>60	Post	Ductal/NST	NA	III+IV	NA	NA	NA	2.6	0	0.0089223	low
TCGA-E9-A1R4	>60	Post	Ductal/NST	NA	I+II	NA	NA	NA	6.2	0	0.390959	high
TCGA-E9-A1R5	>60	Post	Ductal/NST	NA	I+II	NA	NA	NA	3.06667	0	0.0330455	low
TCGA-E9-A1R6	>60	Post	Ductal/NST	NA	I+II	NA	NA	NA	11.3	0	-0.062385	low
TCGA-E9-A1R7	>60	Post	Ductal/NST	NA	I+II	NA	NA	NA	48.9	0	0.262686	high
TCGA-E9-A1RA	<60	Pre	Ductal/NST	NA	I+II	NA	NA	NA	45.6333	0	0.0570501	low
TCGA-E9-A1RB	<60	Pre	Ductal/NST	NA	I+II	NA	NA	NA	32.5333	1	0.401966	high
TCGA-E9-A1RC	<60	Post	Other	NA	III+IV	NA	NA	NA	40.8	0	0.358331	high
TCGA-E9-A1RD	>60	Post	Ductal/NST	NA	I+II	NA	NA	NA	1.13333	0	0.0962566	low
TCGA-E9-A1RE	>60	Post	Ductal/NST	NA	III+IV	NA	NA	NA	47.3	0	-0.126062	low
TCGA-E9-A1RF	>60	Post	Ductal/NST	NA	III+IV	NA	NA	NA	6.66667	0	-0.285363	low
TCGA-E9-A1RG	>60	Post	Ductal/NST	NA	III+IV	NA	NA	NA	21.5667	0	-0.2016	low
TCGA-E9-A1RH	>60	Post	Ductal/NST	NA	I+II	NA	NA	NA	47.2333	0	0.106952	low
TCGA-E9-A1RI	<60	Pre	Other	NA	III+IV	NA	NA	NA	48.3	0	0.0250189	low
TCGA-E9-A226	<60	Pre	Ductal/NST	NA	III+IV	NA	NA	NA	34.9333	1	1.4057	high
TCGA-E9-A227	<60	Pre	Ductal/NST	NA	I+II	Positive	Positive	Negative	32.5	0	-0.633875	low
TCGA-E9-A228	<60	Post	Ductal/NST	NA	I+II	NA	NA	NA	42.8333	0	0.492878	high
TCGA-E9-A229	<60	Pre	Ductal/NST	NA	I+II	NA	NA	NA	38.2667	0	0.162466	low
TCGA-E9-A22A	>60	Post	Ductal/NST	NA	I+II	Positive	Negative	Negative	39.6333	0	-0.153762	low
TCGA-E9-A22B	>60	Post	Other	NA	I+II	Positive	Negative	Negative	38.9	0	0.270908	high
TCGA-E9-A22D	<60	Pre	Ductal/NST	NA	I+II	Positive	Positive	Positive	41.6	0	-1.08638	low
TCGA-E9-A22E	<60	Post	Ductal/NST	NA	III+IV	Positive	Positive	Positive	42.3	0	0.0117513	low
TCGA-E9-A22G	<60	Post	Ductal/NST	NA	I+II	Negative	Negative	Positive	41.3	0	0.0506595	low
TCGA-E9-A22H	<60	Pre	Ductal/NST	NA	I+II	Positive	Positive	Positive	41.0667	0	-0.206677	low
TCGA-E9-A243	<60	Pre	Ductal/NST	NA	I+II	NA	NA	NA	20.4	0	-0.555054	low
TCGA-E9-A247	<60	Post	Ductal/NST	NA	I+II	NA	NA	NA	39.5333	0	-0.199174	low
TCGA-E9-A248	<60	Pre	Ductal/NST	NA	I+II	NA	NA	NA	1.96667	0	-0.578812	low
TCGA-E9-A249	<60	Pre	Ductal/NST	NA	I+II	NA	NA	NA	7.23333	0	-0.308301	low
TCGA-E9-A24A	>60	Post	Ductal/NST	NA	I+II	NA	NA	NA	24.9	0	0.110044	low
TCGA-E9-A295	>60	Post	Other	NA	I+II	Positive	Positive	Positive	12.5	0	-0.174607	low
TCGA-E9-A2JS	>60	Post	Other	NA	I+II	NA	NA	NA	30.1333	1	0.122147	low
TCGA-E9-A2JT	>60	Post	Other	NA	I+II	NA	NA	NA	9.6	0	-0.42482	low
TCGA-E9-A3HO	<60	Pre	Other	NA	I+II	NA	NA	NA	38.6	0	-0.368437	low
TCGA-E9-A3Q9	>60	Post	Other	NA	III+IV	Positive	Positive	NA	33.3667	0	-0.276256	low
TCGA-E9-A3QA	<60	Pre	Other	NA	I+II	NA	NA	NA	30.6	0	0.089239	low
TCGA-E9-A3X8	<60	Post	Other	NA	I+II	Positive	Positive	Positive	30.8667	0	-0.488752	low
TCGA-E9-A54X	>60	Post	Other	NA	I+II	Positive	Positive	Negative	24.2333	0	0.0136643	low
TCGA-E9-A54Y	>60	Post	Other	NA	III+IV	Positive	Positive	Negative	24.1667	0	-0.490698	low
TCGA-E9-A5FK	<60	Post	Other	NA	III+IV	Positive	Positive	Negative	27.0667	0	-0.383608	low
TCGA-E9-A5UO	<60	Pre	Other	NA	I+II	NA	NA	NA	26.1667	0	-0.601294	low
TCGA-E9-A5UP	>60	Post	Other	NA	I+II	NA	NA	NA	26.7667	0	-0.263244	low
TCGA-E9-A6HE	<60	Pre	Other	NA	III+IV	Positive	Positive	Negative	28.2333	0	-0.207552	low
TCGA-EW-A1IW	>60	Post	Other	NA	I+II	Positive	Positive	Positive	12.3667	0	0.122265	low
TCGA-EW-A1IX	<60	Pre	Other	NA	I+II	Positive	Positive	Negative	40.2667	0	-0.0898119	low
TCGA-EW-A1IY	<60	Pre	Ductal/NST	NA	I+II	Positive	Positive	Negative	8.6	0	-0.324435	low
TCGA-EW-A1IZ	<60	Post	Ductal/NST	NA	III+IV	Positive	Positive	Negative	18.4667	0	-0.499919	low
TCGA-EW-A1J1	<60	Pre	Ductal/NST	NA	I+II	Positive	Positive	Negative	19.1667	0	-0.65978	low
TCGA-EW-A1J3	>60	Post	Other	NA	I+II	Positive	Positive	Positive	16.8	0	-0.255502	low
TCGA-EW-A1J5	<60	Post	Other	NA	I+II	Positive	Positive	Negative	15.9	0	-0.462251	low
TCGA-EW-A1J6	>60	Post	Ductal/NST	NA	I+II	Positive	Positive	Negative	29.1667	0	-0.68555	low
TCGA-EW-A1OV	<60	Post	Ductal/NST	NA	I+II	Negative	Negative	Negative	26.3	0	-0.49346	low
TCGA-EW-A1OW	<60	Post	Ductal/NST	NA	I+II	Negative	Negative	Negative	23.1333	0	-0.277308	low
TCGA-EW-A1OX	<60	Pre	Other	NA	I+II	Positive	Positive	Negative	30.3667	0	0.501123	high
TCGA-EW-A1OY	>60	Post	Ductal/NST	NA	I+II	Positive	Positive	Negative	30.2667	0	-0.181607	low
TCGA-EW-A1OZ	<60	Post	Ductal/NST	NA	I+II	Positive	Negative	Negative	40.9667	0	-0.231028	low
TCGA-EW-A1P0	<60	Post	Other	NA	I+II	Positive	Negative	Negative	41.7	0	-0.024689	low
TCGA-EW-A1P3	<60	Pre	Ductal/NST	NA	I+II	Positive	Positive	Negative	53.7	0	-0.229622	low
TCGA-EW-A1P4	<60	Pre	Other	NA	I+II	Negative	Negative	Negative	30.2333	0	-0.0860193	low
TCGA-EW-A1P5	>60	Post	Ductal/NST	NA	I+II	Positive	Positive	Negative	23.4333	0	-0.0764508	low
TCGA-EW-A1P6	>60	Post	Ductal/NST	NA	I+II	Positive	Positive	Negative	18.7333	0	0.218629	high
TCGA-EW-A1P8	<60	Post	Ductal/NST	NA	III+IV	Negative	Negative	Negative	7.96667	1	0.914884	high
TCGA-EW-A1PA	<60	Post	Ductal/NST	NA	I+II	Positive	Positive	Negative	19.1667	0	-0.345765	low
TCGA-EW-A1PB	>60	Post	Ductal/NST	NA	III+IV	Negative	Negative	Negative	20.2667	0	0.0114047	low
TCGA-EW-A1PC	>60	Post	Ductal/NST	NA	I+II	Positive	Positive	Negative	6.23333	0	0.530502	high
TCGA-EW-A1PD	>60	Pre	Ductal/NST	NA	NA	Positive	Positive	Negative	14.1333	0	0.616068	high
TCGA-EW-A1PE	<60	Post	Ductal/NST	NA	I+II	Positive	Positive	Negative	10.6667	0	-0.34507	low
TCGA-EW-A1PF	<60	Post	Ductal/NST	NA	I+II	Positive	Positive	Negative	14.6333	0	-0.0220526	low
TCGA-EW-A1PH	<60	Post	Ductal/NST	NA	I+II	Negative	Negative	Negative	20.2333	0	-0.181502	low
TCGA-EW-A2FR	<60	Post	Ductal/NST	NA	III+IV	Negative	Negative	Negative	55.7667	0	0.276058	high
TCGA-EW-A2FS	<60	Pre	Ductal/NST	NA	I+II	Positive	Negative	Negative	53.4667	0	-0.645066	low
TCGA-EW-A2FV	<60	Pre	Other	NA	III+IV	Positive	Positive	Negative	26.2667	0	-0.102948	low
TCGA-EW-A2FW	<60	Post	Other	NA	I+II	Positive	Positive	Negative	22.4	0	0.00791268	low
TCGA-EW-A3E8	<60	Pre	Other	NA	I+II	Positive	Negative	Negative	34.5	0	-0.437284	low
TCGA-EW-A3U0	>60	Post	Ductal/NST	NA	III+IV	Negative	Negative	Negative	17.7333	0	-0.278336	low
TCGA-EW-A423	>60	Post	Other	NA	I+II	Positive	Positive	Negative	17.7667	0	-0.140203	low
TCGA-EW-A424	<60	Pre	Other	NA	III+IV	Positive	Positive	Positive	23.8333	0	0.00674756	low
TCGA-EW-A6S9	<60	Pre	Ductal/NST	NA	I+II	Positive	Positive	Positive	15.4333	0	0.502483	high
TCGA-EW-A6SA	<60	Pre	Ductal/NST	NA	NA	Positive	Negative	Negative	17	0	-0.103519	low
TCGA-EW-A6SB	>60	Pre	Ductal/NST	NA	I+II	Negative	Negative	Negative	25.3333	0	-0.608448	low
TCGA-EW-A6SC	<60	Pre	Other	NA	I+II	Positive	Positive	Negative	31.7333	0	-0.464071	low
TCGA-EW-A6SD	<60	Pre	Ductal/NST	NA	I+II	Negative	Negative	Positive	33.6667	0	0.272981	high
TCGA-GI-A2C8	>60	Pre	Ductal/NST	NA	III+IV	Positive	Positive	Negative	7.5	0	0.0642449	low
TCGA-GI-A2C9	<60	Post	Ductal/NST	NA	I+II	Negative	Negative	Negative	111.4	0	0.211857	high
TCGA-GM-A2D9	>60	Post	Ductal/NST	NA	I+II	Positive	Positive	NA	60.4	1	-0.0207437	low
TCGA-GM-A2DA	<60	Post	Ductal/NST	NA	I+II	Positive	Positive	Negative	219.767	1	-0.88905	low
TCGA-GM-A2DB	>60	Post	Ductal/NST	NA	I+II	Negative	Negative	Negative	80.2	0	-0.633982	low
TCGA-GM-A2DC	<60	Post	Ductal/NST	NA	I+II	Positive	Positive	NA	84.5	0	-0.170813	low
TCGA-GM-A2DF	<60	Post	Ductal/NST	NA	I+II	Negative	Negative	Negative	71.8333	0	-0.285154	low
TCGA-GM-A2DH	<60	Post	Ductal/NST	NA	I+II	Negative	Negative	Negative	73.1	0	-0.447453	low
TCGA-GM-A2DI	<60	Pre	Ductal/NST	NA	I+II	Negative	Negative	NA	86.3333	0	-0.773195	low
TCGA-GM-A2DK	<60	Post	Ductal/NST	NA	I+II	Positive	Negative	Negative	88.1667	0	-0.269786	low
TCGA-GM-A2DL	<60	Pre	Ductal/NST	NA	I+II	Positive	Positive	Negative	117.3	0	-0.213743	low
TCGA-GM-A2DM	<60	Post	Ductal/NST	NA	I+II	Positive	Positive	Negative	107.533	0	0.213853	high
TCGA-GM-A2DN	<60	Post	Ductal/NST	NA	I+II	Positive	Positive	Negative	103.033	0	-0.553433	low
TCGA-GM-A2DO	<60	Post	Other	NA	I+II	Positive	Positive	Negative	86.5333	0	-1.32157	low
TCGA-GM-A3NW	>60	Post	Other	NA	I+II	Negative	Positive	Negative	112.033	0	-0.501684	low
TCGA-GM-A3NY	>60	Post	Other	NA	I+II	Positive	Positive	Negative	38.7333	0	-0.669887	low
TCGA-GM-A3XG	<60	Pre	Other	NA	III+IV	Positive	Positive	Negative	44.3333	0	-0.200958	low
TCGA-GM-A3XL	<60	Post	Ductal/NST	NA	I+II	Negative	Negative	NA	70.2667	0	0.0134129	low
TCGA-GM-A3XN	<60	Post	Other	NA	III+IV	Positive	Positive	Negative	67.3	0	-0.0765346	low
TCGA-GM-A4E0	>60	Post	Other	NA	III+IV	Positive	Positive	NA	73.0333	0	-0.0899708	low
TCGA-GM-A5PV	>60	Post	Other	NA	I+II	Positive	Positive	NA	13.7333	0	-0.334182	low
TCGA-GM-A5PX	>60	Post	Other	NA	I+II	Positive	Positive	Negative	18.3667	0	-0.00641939	low
TCGA-HN-A2NL	<60	Post	Other	NA	I+II	Negative	Negative	Negative	2.63333	0	-0.953134	low
TCGA-HN-A2OB	<60	Pre	Other	NA	I+II	Positive	Positive	Negative	63.3333	1	-0.0571563	low
TCGA-JL-A3YW	<60	Post	Other	NA	I+II	Positive	Positive	Positive	12	0	0.333909	high
TCGA-JL-A3YX	<60	Post	Other	NA	I+II	Positive	Positive	Positive	11.7333	0	-0.022554	low
TCGA-LD-A66U	<60	Pre	Other	NA	I+II	Positive	Positive	Negative	21.5333	0	-0.399782	low
TCGA-LD-A74U	>60	Pre	Other	NA	III+IV	Positive	Negative	Negative	13.4	0	0.333898	high
TCGA-LD-A7W6	<60	Post	Other	NA	I+II	Positive	Positive	Negative	13.4667	0	-0.538993	low
TCGA-LL-A440	>60	Post	Other	NA	I+II	Positive	Positive	Negative	25.3	0	0.392124	high
TCGA-LL-A442	<60	Post	Ductal/NST	NA	I+II	Positive	Positive	Negative	29.6333	0	0.0539884	low
TCGA-LL-A50Y	>60	Post	Other	NA	I+II	Positive	Positive	Negative	25.4	0	-0.395714	low
TCGA-LL-A5YL	>60	Post	Other	NA	I+II	Positive	Negative	Positive	17.3	0	0.183491	high
TCGA-LL-A5YM	>60	Post	Ductal/NST	NA	III+IV	Positive	Positive	Negative	15.5333	0	-0.755062	low
TCGA-LL-A5YN	<60	Post	Ductal/NST	NA	I+II	Positive	Positive	Negative	14.9	0	-0.553006	low
TCGA-LL-A5YO	<60	Pre	Ductal/NST	NA	I+II	Negative	Negative	Negative	14.6667	0	-0.326949	low
TCGA-LL-A5YP	<60	Post	Ductal/NST	NA	I+II	Positive	Negative	Negative	15	0	0.484002	high
TCGA-LL-A6FP	>60	Post	Other	NA	I+II	Positive	Positive	Negative	22.5667	0	0.306241	high
TCGA-LL-A6FQ	>60	Post	Ductal/NST	NA	III+IV	Positive	Positive	Negative	2.66667	0	-0.310612	low
TCGA-LL-A6FR	<60	Post	Ductal/NST	NA	I+II	Negative	Positive	Negative	16.3	0	0.0675788	low
TCGA-LL-A73Y	>60	Post	Ductal/NST	NA	I+II	Negative	Negative	Negative	15.9	0	-0.231929	low
TCGA-LL-A740	>60	Post	Ductal/NST	NA	I+II	Negative	Negative	Negative	14.7	0	0.0285416	low
TCGA-LL-A7SZ	<60	Pre	Ductal/NST	NA	I+II	Positive	Positive	Negative	19.8	0	-0.676829	low
TCGA-LL-A7T0	>60	Post	Ductal/NST	NA	I+II	Positive	Positive	Positive	12.5333	0	-0.331716	low
TCGA-LL-A8F5	>60	Post	Ductal/NST	NA	I+II	Positive	Negative	Negative	19.8667	0	-0.528323	low
TCGA-LL-A9Q3	>60	Post	Other	NA	III+IV	Positive	Positive	Positive	17.7333	0	-0.155723	low
TCGA-LQ-A4E4	>60	Post	Other	NA	III+IV	Positive	Positive	NA	28.3	0	-0.0347518	low
TCGA-MS-A51U	<60	Pre	Other	NA	I+II	Positive	Positive	Negative	22.7	0	-0.672248	low
TCGA-OK-A5Q2	<60	Pre	Other	NA	I+II	Positive	Positive	Negative	2.13333	0	0.0888192	low
TCGA-OL-A5D7	>60	Post	Ductal/NST	NA	I+II	Negative	Negative	NA	59.3333	0	-0.285947	low
TCGA-OL-A5D8	<60	Pre	Ductal/NST	NA	I+II	Positive	Positive	NA	32.4333	0	-0.0386379	low
TCGA-OL-A5DA	>60	Post	Other	NA	I+II	Positive	Positive	NA	59.4333	0	-0.407267	low
TCGA-OL-A5RU	>60	Post	Ductal/NST	NA	I+II	Positive	Positive	NA	40.6333	0	-0.645164	low
TCGA-OL-A5RV	<60	Pre	Ductal/NST	NA	III+IV	Positive	Positive	NA	35.4	0	-0.150147	low
TCGA-OL-A5RW	<60	Pre	Ductal/NST	NA	I+II	Negative	Negative	NA	36.8667	0	-0.352227	low
TCGA-OL-A5RX	<60	Pre	Ductal/NST	NA	I+II	Positive	Positive	NA	29.2667	0	-0.305482	low
TCGA-OL-A5RZ	<60	Post	Ductal/NST	NA	I+II	Positive	Negative	NA	22.6333	0	-0.181362	low
TCGA-OL-A5S0	>60	Post	Ductal/NST	NA	I+II	Positive	Negative	NA	20.6667	0	-0.0681123	low
TCGA-OL-A66I	<60	Pre	Ductal/NST	NA	I+II	Negative	Negative	NA	23.8	0	-0.59925	low
TCGA-OL-A66J	>60	Post	Other	NA	I+II	Positive	Positive	NA	66.5333	0	-0.271205	low
TCGA-OL-A66K	>60	Post	Other	NA	I+II	Positive	Positive	Negative	42.5	1	-0.269074	low
TCGA-OL-A66L	>60	Post	Ductal/NST	NA	I+II	Positive	Positive	NA	43.3667	0	-0.240852	low
TCGA-OL-A66N	<60	Post	Other	NA	III+IV	Positive	Negative	NA	26.4	0	-0.222711	low
TCGA-OL-A66O	<60	Pre	Ductal/NST	NA	I+II	Positive	Positive	NA	17.6	0	-0.836853	low
TCGA-OL-A66P	>60	Pre	Ductal/NST	NA	I+II	Negative	Negative	NA	14.2667	0	-0.800765	low
TCGA-OL-A6VO	<60	Pre	Ductal/NST	NA	I+II	Negative	Negative	Negative	28.6	0	0.33155	high
TCGA-OL-A6VQ	<60	Pre	Other	NA	I+II	Positive	Positive	NA	20	0	-0.367885	low
TCGA-OL-A6VR	<60	Pre	Ductal/NST	NA	I+II	Positive	Positive	Negative	40.6667	0	0.130159	low
TCGA-PE-A5DC	>60	Post	Other	NA	III+IV	Positive	Positive	Positive	47.6667	1	-0.221401	low
TCGA-PE-A5DD	>60	Post	Other	NA	I+II	Positive	Negative	Positive	65.1	0	-0.064359	low
TCGA-PE-A5DE	<60	Pre	Other	NA	I+II	Positive	Positive	Negative	88.1667	0	-0.648865	low
TCGA-PL-A8LZ	<60	Pre	Ductal/NST	NA	III+IV	NA	NA	NA	10.0667	0	0.0800351	low
TCGA-S3-A6ZF	>60	Post	Ductal/NST	NA	I+II	Positive	Positive	Negative	19.0667	0	0.0211689	low
TCGA-S3-A6ZG	>60	Post	Other	NA	I+II	Positive	Positive	Negative	18.7333	0	0.150146	low
TCGA-S3-A6ZH	<60	Pre	Ductal/NST	NA	III+IV	Positive	Positive	Negative	21.3667	0	-0.12374	low
TCGA-S3-AA0Z	>60	Post	Ductal/NST	NA	I+II	Positive	Positive	Negative	20.9667	0	0.105204	low
TCGA-S3-AA10	>60	Post	Ductal/NST	NA	I+II	Negative	Negative	Negative	19.5333	0	-0.773974	low
TCGA-S3-AA11	>60	Post	Ductal/NST	NA	I+II	Positive	Positive	Negative	14.0333	0	0.342111	high
TCGA-S3-AA12	>60	Post	Ductal/NST	NA	III+IV	Positive	Negative	Negative	19.1333	0	-0.128226	low
TCGA-S3-AA14	<60	Post	Ductal/NST	NA	I+II	Positive	Positive	Positive	17.6333	0	-0.0583077	low
TCGA-S3-AA15	<60	Post	Ductal/NST	NA	I+II	Negative	Negative	Negative	17.5	0	-0.523474	low
TCGA-S3-AA17	>60	Post	Ductal/NST	NA	I+II	Positive	Positive	Negative	14.1333	0	-0.572695	low
TCGA-UL-AAZ6	>60	Post	Ductal/NST	NA	I+II	Positive	Positive	Positive	17.2667	0	-0.0198949	low
TCGA-UU-A93S	>60	Post	Ductal/NST	NA	III+IV	Negative	Negative	Positive	3.86667	1	0.593619	high
TCGA-V7-A7HQ	>60	Post	Ductal/NST	NA	III+IV	Positive	Positive	NA	67.7667	0	-0.515288	low
TCGA-W8-A86G	>60	Post	Other	NA	I+II	Positive	Positive	Negative	11.5667	0	0.00487287	low
TCGA-WT-AB41	<60	Post	Ductal/NST	NA	I+II	Positive	Positive	NA	53.7	0	-0.718186	low
TCGA-WT-AB44	>60	Post	Other	NA	I+II	Positive	Positive	Negative	29.4333	0	-0.158966	low
TCGA-XX-A899	<60	Post	Other	NA	III+IV	Positive	Positive	Negative	15.5667	0	-0.057947	low
TCGA-XX-A89A	>60	Post	Other	NA	I+II	Positive	Positive	Negative	16.2667	0	0.107991	low
TCGA-Z7-A8R5	>60	Post	Other	NA	III+IV	Positive	Positive	Negative	109.567	0	0.00506074	low
TCGA-Z7-A8R6	<60	Pre	Other	NA	I+II	Positive	Positive	Negative	108.533	0	-0.17714	low
